# Supplementary material for: The landscape of genomic imprinting across diverse adult human tissues
Source: HighWire-hosted journal article supplement (doi:10.1101/gr.192278.115), 2015-05-07
Supplement: Supp_Data5.zip [file Baran_figure_files.xlsx]

## Sheet: Sheet1
Fig1	haploscatter_DLK1	haploscatter_MEST	snpscatter_PAX8	snpscatter_MAP2K3	snpscatter_UQCRFS1
Fig2	heatmap_impr_tau	heatmap_impr_tau_legend
Fig3	biallelic.patmat.pergene.barplot.merged	het_ZNF331_ind_tis_snp_heatmap	sexdiff_muscle	expr_bae_mae_pergene_scatter_noname	expr_bae_mae_pergene_scatter
Fig4	tissueplots_alltis_IGF2_GRB10_ZDBF2
SFig5	chrx_biall_histograms	chrx_monoclonal_barplot
SFig6	[manual landscape plots from UCSC]
SFig7	[manual sashimi plots from IGV]
SFig8	expr_known_novel	imprprop_known_novel
SFig9	genes_classes_barplot
SFig10	heatmap_known_tau
SFig11	ratio_scatters	total_count_hist
SFig12	biallelic.impr.barplot	biallelic.known.barplot	biallelic.impr.biall.barplot1_matpat
SFig13	biallelic.impr.barplot.genes	monoa_prop_genehist	biallelic.known.barplot.genes
SFig14	heatmap_brainsub_tau	tissuescatters_brsub_L3MBTL1
SFig15	tissueplots_alltis_IGF2
SFig16	tissueplots_alltis_GRB10
SFig17	GRB10_brain_muscle_blood_rel_expr	[manual sashimi plots from IGV]
SFig18	het_ind_gene_snp_heatmap	het_KCNQ1_ind_tis_snp_heatmap	het_PPIEL_ind_tis_snp_heatmap
SFig19	sexdiff_musle_pergene
SFig20	tissue_rpkm_boxplot
SFig21	expr_bae_mae_pergene	heatmap_impr_expr_logrpkm
SFig22	pergene_fc_boxplot	exprchange_tissue_volcano
SFig23	imp_all_F_boxplot	imp_all_L_boxplot	imp_all_T_boxplot
SFig24	methylation_landscape_boxplot_MEST_F	methylation_landscape_boxplot_SNRPN_F	methylation_landscape_lineplot_MEST_F	methylation_landscape_lineplot_SNRPN_F
