# Supplementary material for: The landscape of genomic imprinting across diverse adult human tissues
Source: HighWire-hosted journal article supplement (doi:10.1101/gr.192278.115), 2015-05-07
Supplement: Supplemental_Material.pdf [file Supplemental_Material.pdf]

# Supplementary Materials for

## **The Landscape of Genomic imprinting across diverse adult human tissues**

Yael Baran<sup>1</sup>, Meena Subramaniam<sup>2</sup>, Anne Biton<sup>2</sup>, Taru Tukiainen<sup>3,4</sup>, Emily K Tsang<sup>5,6</sup>, Manuel A Rivas<sup>7</sup>, Matti Pirinen<sup>8</sup>, Maria Gutierrez-Arcelus<sup>9</sup>, Kevin S Smith<sup>5</sup>, Kim R Kukurba<sup>5,10</sup>, Rui Zhang<sup>10</sup>, Celeste Eng<sup>2</sup>, Dara G Torgerson<sup>2</sup>, Cydney Urbanek<sup>11</sup>, the GTEx Consortium, Jin Billy Li<sup>10</sup>, Jose R. Rodriguez-Santana<sup>12</sup>, Esteban G. Burchard<sup>2,13</sup>, Max A. Seibold<sup>11,14,15</sup>, Daniel G MacArthur<sup>3,4,16</sup>, Stephen B Montgomery<sup>5</sup>, Noah A Zaitlen<sup>2†\*</sup>, Tuuli Lappalainen<sup>17,18†\*</sup>

Correspondence to: [tlappalainen@nygenome.org](mailto:tlappalainen@nygenome.org) , [noah.zaitlen@ucsf.org](mailto:noah.zaitlen@ucsf.org)

### **This PDF file includes:**

Materials and Methods  
Figs. S1-S24  
Captions for tables S1-S7  
Captions for data S1-S5

### **Other Supplementary Materials for this manuscript includes the following:**

Tables S1-4, S6-7 as an Excel file with multiple tabs  
Table S5 as a zipped txt file  
Data files S1-S5

## **Materials and Methods**

### **1. Trio validation data**

#### 1.1 Genetics of Inherited Muscle Disease Cohort

Imprinting was assessed in skeletal muscle from six individuals for whom both individual and parental genotypes were available, hence allowing for the parental origin of the alleles to be determined. More specifically, the data set consists of five trios and one child-mother pair that were exome sequenced as part of a larger cohort (dbGaP accession

phs000655.v1.p1) the six probands each being affected with a neuromuscular disorder of currently unknown cause.

Exome capture was performed with Agilent SureSelect Human All Exon Kit v2 and the exome DNA was sequenced using Illumina HiSeq 2000 sequencer. Sequencing reads were aligned to the human reference genome (hg19) before calling single-nucleotide variants (SNVs) and small indels using the GATK version 3.0. A modified version of the Ensembl Variant Effect Predictor was used for variant annotation. The genotypes of the probands of the five trios and one parent-child pair were phased using the PhaseByTransmission tool of the GATK toolkit.

Non-strand specific RNA sequencing was performed for the poly-A selected mRNA isolated from the skeletal muscle biopsies using Illumina Tru Seq RNA Sample Preparation protocol with 76 bp paired-end sequencing reads. The sequencing was done on an Illumina HiSeq 2000 with five of the individuals sequenced to coverage of 50M and one to 500M of mapped paired-end reads. RNA-seq reads were aligned using Tophat version v1.4.1 with the UCSC human genome release version hg19 as the reference.

All exome and RNA sequencing was performed at the Broad Institute of Harvard and MIT following the same protocols used in the GTEx project, and the same ASE pipeline was used for this a data as for the GTEx data.

## 1.2 Genes-environments & Admixture in Latino Americans (GALA II)

Imprinting was assessed in nasal epithelium and whole blood from 10 trios from the GALA II cohort (Torgerson et al. 2011). More specifically, the data set consists of ten trios of Puerto Rican/Latino origin that were exome-sequenced. The ten probands were then RNA-sequenced in both tissues. Latino asthmatic probands and parents are Puerto Rican islanders recruited as part of the ongoing Genes Environments & Admixture in Latino Americans (GALA II) study described elsewhere (Borrell et al. 2013; Kumar et al. 2013; Nishimura et al. 2013). The nasal airway epithelium RNA-seq data used was previously published in a separate analysis of asthma differential expression (Poole et al. 2014). Probands had no history of smoking or recent nasal steroid use (within 4 weeks of recruitment). Methods for nasal airway brushing collection are described elsewhere (Poole et al. 2014). The study was approved by local institutional review boards, and written assent/consent was received from all subjects and their parents.

Exome capture was performed with Nimblegen SeqCap EZ Human Exome Library v3.0 and the exome DNA was sequenced using Illumina HiSeq 2500 sequencer to an average read depth of 39x. Sequencing reads were aligned to the human reference genome (hg19) before calling single-nucleotide variants (SNVs) and small indels using the GATK version 3.3-0. The genotypes of the probands of the ten trios were phased using the parent-offspring trio phasing of Beagle, and parental origin of each allele was assigned by matching phased parental haplotypes to offspring haplotypes within a 2000bp window above and below the SNP. If an exact match could not be found between the parental and offspring haplotypes, and the parental origin could not be inferred solely from the

genotypes at the SNP, then the parental origin of the allele was considered to be ambiguous.

Both nasal airway and blood RNA-seq libraries from the 10 probands were constructed and barcoded with the Illumina Tru Seq RNA Sample Preparation version 2 protocol (Illumina, San Diego, Calif). Barcoded RNA-seq libraries were run on flow cells of an Illumina HiSeq 2000 according to standard protocols using 2x100 paired end sequencing. RNA-seq reads were aligned using Tophat version v2.0.9 with the UCSC human genome release version hg19 as the reference. The same ASE pipeline was used for this data as for the GTEx data.

## **2. mmPCR-seq validation data**

Microfluidic multiplex PCR sequencing (mmPCR-seq) (Zhang et al. 2014) was used to validate allelic ratios measured by RNA-Seq in 89 sites in 24 genes: ATP10A, COPG2, CPA4, ERLIN2, GRB10, H19, IGF2, KCNQ1, NAA60, NLRP2, NTM, PEG3, PHLDA2, PLAGL1, PPP1R9A, RB1, RBP5, SLC22A18, SNHG14, SNRPN, SNURF, UBE3A, WRB, ZNF331. The analysis was done for 121 GTEx samples from 9 individuals. The details of the experiment are in (Rivas et al. 2015). Briefly, PCR primers were designed to amplify the loci surrounding each site, and cDNA obtained from the RNA samples was amplified in multiplex PCR reactions using the Fluidigm Access Array. The pooled mmPCR libraries were sequenced on a MiSeq yielding 75 bp paired-end reads, and the data were aligned with STAR (Dobin et al. 2013) – alignment with TopHat yielded very similar results. Allelic counts were retrieved using an identical pipeline as for the GTEx RNA-seq data. The low number of individuals in the validation experiment did not allow us to use the statistical models developed for population-level RNA-seq data, but the allelic ratios obtained from mmPCR-seq data showed that the allelic counts themselves are reliable.

## **3. Long-read RNA-seq validation data**

Standard RNA-seq data with relatively short reads can suffer from alignment errors and difficulty of determining the structure and annotation of the sequenced transcripts (Cho et al. 2014; Li et al. 2014). To this end, we analyzed long read strand-specific RNA-seq data (2 x 250 bp) from 34 GTEx samples from 5 individuals.

### **3.1. Library preparation, sequencing, and data processing**

RNA sequencing was performed using a strand specific protocol with poly-A selection of mRNA. Strand specific RNA sequencing was performed at the Broad Institute using a large-scale, automated variant of the Illumina Tru Seq™ RNA Sample Preparation protocol. Briefly, 200 ng of total RNA was used from each sample as the starting material. This method uses oligo dT beads to select poly-A mRNA from the total RNA sample. The selected RNA is then heat fragmented and randomly primed before cDNA

synthesis from the RNA template. The resultant cDNA then goes through Illumina library preparation (end repair, base 'A' addition, adapter ligation, and enrichment) using Broad designed indexed adapters for multiplexing of samples, with 400 bp fragment size. After enrichment, the samples are qPCR quantified and equimolar pooled before proceeding to Illumina sequencing which was done on the Illumina HiSeq 2000 to a target depth of 100M reads. The entire process occurs in a 96-well format and all samples were electronically tracked through the process in real-time including reagent lot numbers, specific automation used, time stamps for each process step, and automatic registration.

RNA-seq data were aligned with Tophat version v1.4.1 to the UCSC human genome release version hg19. Gencode version 12 was used as a transcriptome model for the alignment as well as all gene and isoform quantifications. Unaligned reads were merged back in to create a final bam. Allele-specific expression was analyzed as for the other data sets.

### 3.2. Long read data analysis and results

Allele-specific expression estimates from the 2 x 250 bp and the standard 2 x 75 bp data are fully concordant ( $\rho = 0.99$  based on 707 sites with  $\geq 20$  reads), showing that alignment error does not affect to our original estimates of monoallelic expression. Furthermore, using these data, we manually assessed each of the initial 21 novel or provisional genes to verify that (1) the transcript structure in the data corresponded to the gene annotation, (2) SNPs in the ASE analysis were in regions that correspond to the annotated transcripts, and (3) monoallelic SNPs did not overlap with known imprinted genes and showed no signs of switching between monoallelic/biallelic expression along the gene (Supplementary Figure 7).

The long read RNA-seq data showed that 4 out of 21 novel/provisional genes (LA16c-306E5.2, RP11-701H24.3, AL132709.5, RP11-395B7.2) were inconsistent with the gene annotations, showing either ambiguous (although often likely imprinted) transcription, or in one case imprinting derived from heterozygous SNPs that overlapped regions of a different known imprinted gene. These genes were removed from downstream analysis. All the other novel/provisional genes were relatively consistent with the Gencode annotation, although future work is needed to elucidate full transcript structure and gene annotation in the imprinted regions. See also section 9 for discussion of patterns observed in specific genes.

## **4. RNA-seq allele counts**

For all the heterozygous sites per individual identified from genetic data, we calculated the number of REF and ALT alleles in RNA-sequencing data using the same pipeline for all the data sets – this has also been used in the original papers of each of the studies. We used only uniquely mapped reads, and required base quality  $>10$ . We excluded heterozygous sites with potential mapping errors: 50bp mapability  $<1$  in the UCSC mapability track, and  $>5\%$  bias in simulated RNA-sequencing data (Panousis et al. under review).

## 5. Methylation analysis

The Gencord data set includes methylation data from the Illumina 450K array from 107 fibroblast samples, 111 LCL samples, and 66 T-cell samples. In our analysis, we used normalized  $\beta$ -values; further details of the experiment and data processing are available in the original publication.

## 6. Statistical Method

We first describe the proposed model and the filtering steps we take. We then describe the classification based on the statistics output by our model. We conclude this section with a simulation study to examine edge properties of our approach.

### 6.1 Statistical Model

The input to our model is the genotypes (typed and imputed) of each individual, and the counts of RNA-seq alleles overlapping each SNP in each individual. We use the following notation for the count data:

$n_{ij}$  - number of reads mapped to SNP  $j$  in individual  $i$

$r_{ij}$  - number of reads with the *ref* allele mapped to SNP  $j$  in individual  $i$

$h_{ij}$  - number of reads mapped to SNP  $j$  in individual  $i$  and phased to haplotype 1 (of unknown parental origin and with arbitrary haplotype numbering; these counts were generated by phasing the genotypes and combining alleles of the same haplotype)

We perform the analysis for each gene and for each tissue separately. Tissue indices are therefore discarded from the notation.

We use the following error probabilities:

$p_g$  - genotyping error rate: set to 0.001 for non-imputed SNPs, and to 0.05 for imputed SNPs

$p_s$  - sequencing error rate: set to 0.001

$p_p$  - phasing error rate (we assume phasing errors in different SNPs along the gene are independent): set to 0.2

We say that a SNP is *informative* for a given individual in a given tissue if the individual is heterozygous and the SNP is covered by  $\geq 8$  RNA-seq reads. Although our model accounts for genotyping and phasing error, SNPs covered by a small number of reads are uninformative. We therefore arbitrarily chose a threshold 8 of reads and show via simulation that our method is robust to false positives at this depth (see Section 6.5 below). Informativeness is tissue-specific since a heterozygous SNP may be covered and therefore informative for a given individual in one tissue but not in another. We denote by *site* any combination of (individual, informative SNP). Sites are tissue-specific since informative SNPs are tissue-specific.

A complete list of all symbols is provided in the Supplementary Text.

## 6.2 Filtering Steps

We first apply a series of filtering steps to address several of the technical and functional confounders described above:

a. Filtering of RNA-seq reads according to mapping and base quality to reduce the effect of mapping and sequencing errors, and filtering of SNPs with unreliable mapping to further remove SNPs where allelic mapping error is likely.

b. To filter out SNPs with high genotyping error rates, SNPs with a Hardy Weinberg p-value smaller than  $10^{-3}$  are discarded from the analysis. Figure S1b depicts allele counts for SNPs in a gene for which more than half of the SNPs were removed due to deviation from HWE. Since multiple SNPs in this gene show only reference counts, this gene could potentially be handled also by the “flip test” that we describe in (d) below. In the Geuvadis dataset 2.7% of the SNPs failed the HWE filter.

c. To reduce the effects of NMD, for each gene we discarded individuals carrying a heterozygous premature stop SNP in that gene. Furthermore, NMD causing variants result in monoallelic expression only on heterozygous state, and these variants are typically rare ((Rivas et al. 2015), although see also (Andres et al. 2010)), and it is therefore very unlikely that NMD could cause a confounded imprinting signal with monoallelic expression in the vast majority of individuals. (Note that analogously, an eQTL can cause monoallelic expression only in individuals heterozygous for the eQTL, i.e.  $\leq 50\%$  of individuals under HWE).

d. We apply a tissue-specific “flip test” to verify that the pattern of monoallelic expression is consistent with imprinting. We assume that with imprinting, the identity of a monoallelically expressed allele, either *ref* or *alt*, is independent of parent of origin, and therefore has an equal probability of being either of them. Genotyping error, RNA-seq sequencing error, and allelic bias in RNA-seq mapping are unlikely to flip randomly between the alleles and will therefore fail this test. eQTLs would cause random flipping of monoallelic expression only when the regulatory variant and the coding variants analyzed for monoallelic expression are not in LD; otherwise the SNPs in LD with an eQTL will also have consistently higher expression on one of the two alleles. We apply the flip test as follows:

- 1) For each SNP, we identify all individuals whose expression patterns appear monoallelic, and classify each such monoallelic site as *ref* or *alt* according to the over-expressed allele. Specifically, monoallelic sites are those for which the likelihood of the count data under the imprinted model is higher than the likelihoods under either the balanced or imbalanced models (these models are described next in section “Generative Model”).
- 2) For each SNP, we compute a p-value for the null hypothesis that the fraction of *ref* sites out of all monoallelic sites was drawn from a binomial distribution with  $p=0.5$ . We remove all SNPs with  $p\text{-value} < 0.001$ .

We observe that this filter removes many genotyping and mapping errors. Figure S1c depicts an example of a gene that shows signs of imprinting before the flip test is applied but not afterwards. In the Geuvadis dataset 0.65% of the SNPs failed the “flip test”.

e. For genes with a small number of individuals the flip test will not be well powered. We therefore test for imprinting only genes for which at least one SNP with both *ref* and *alt* monoallelic expression patterns have been observed. This will filter out genes in which monoallelicity either does not exist or is allele-specific and thus possibly driven by genotyping or mapping errors as discussed above. In the Geuvadis dataset, from the set of all genes showing some monoallelic expression, only 2215 qualified by this criterion. We therefore include statistical results of all genes in Supplementary Table S5 such that future studies with additional samples can leverage our analysis to determine additional imprinted genes.

### 6.3 Generative Model

We model individual  $i$ 's status in gene  $g$  and tissue  $t$  as being classified into one of three allelic expression classes:

- (a) BAL (balanced) - The gene is expressed biallelically and evenly from both gene copies.
- (b) IMB (imbalanced) - The gene exhibits allelic imbalance, *i.e.* one gene copy has a moderately higher expression level than the other. Such imbalance may result, for example, from an eQTL, in which case the expression level is sequence-dependent.
- (c) IMP (imprinted) - The gene exhibits imprinting, *i.e.* one gene copy has a considerably higher expression level than the other, potentially depending on the parental origin. We assume that in this scenario one of the copies is nearly completely silenced.

Each allelic expression class is characterized by a Beta distribution (see Figure S3). For the balanced class, the distribution describes the relative expression of the reference allele level (*i.e.* the fraction of *ref* counts out of total counts) of SNPs residing in balanced genes. For the imbalanced and imprinted classes, the distribution describes the relative expression level of alleles residing in the over-expressed gene copy in imbalanced and imprinted genes, respectively. Given the allelic expression class and the phase information, the expression levels of multiple SNPs in the same gene are independently drawn from the relevant beta distribution. Independent sampling of relative expression levels along the gene is done as to account for isoform-specific silencing, splicing QTLs, and other biological effects that may cause inconsistency in allelic expression patterns in proximal sites, as well as for over-dispersion due to technical artifacts. Finally, given the allelic ratio and the total count data in a given site, the reference allele counts are drawn from the corresponding Binomial distribution.

A gene-specific and tissue-specific multinomial distribution determines the probability that any given individual belongs to each of the three expression classes. The multinomial distribution is characterized by the following parameters that sum to 1:

- $\theta_g^{bal}$  - fraction of individuals belonging to the balanced class in gene  $g$
- $\theta_g^{imb}$  - fraction of individuals belonging to the imbalanced class in gene  $g$

$\theta_g^{imp}$  - fraction of individuals belonging to the imprinted class in gene  $g$

This model therefore allows for both imprinted and non-imprinted individuals in the same gene and tissue.

#### 6.4 Model Computations

We first compute the likelihood that the count data observed for SNP  $j$  in individual  $i$  results from a genotyping error:

$$p_{ij}^{gerr} = p_g \cdot \left[ \frac{1}{2} f_{bin}(r_{ij} | p_s, n_{ij}) + \frac{1}{2} f_{bin}(r_{ij} | 1 - p_s, n_{ij}) \right]$$

where  $f_{bin}(x | p, n)$  is the binomial probability density function with parameters  $(p, n)$ , and  $p_g$  is set differently for typed and imputed SNPs, as explained above in *input data*.

We then compute the likelihood of the count data for the entire gene  $g$  given that individual  $i$  belongs to the balanced class:

$$L_{ig}^{bal} = \prod_{snp\ j \in g} \left[ p_{ij}^{gerr} + (1 - p_g) \int_{x=0}^1 f_{beta}^{bal}(x) \cdot f_{bin}(r_{ij} | x, n_{ij}) dx \right]$$

where  $f_{beta}^{bal}(x)$  is the beta probability density function with parameters specific to the balanced class; this is the distribution from which the relative expression level of the reference alleles in balanced genes are sampled.

Similarly, the likelihood of the count data for gene  $g$  given that individual  $i$  belongs to the imprinted class, and that gene copy 1 is expressed (and gene copy 2 is silenced) is:

$$L_{ig}^{imp1} = \prod_{snp\ j \in g} \left[ p_{ij}^{gerr} + (1 - p_g) \int_{x=0}^1 f_{beta}^{imp}(x) \left[ (1 - p_p) \cdot f_{bin}(h_{ij} | x, n_{ij}) + p_p \cdot f_{bin}(n_{ij} - h_{ij} | x, n_{ij}) \right] dx \right]$$

and the likelihood of the same data given that gene copy 2 is the expressed one is:



$$L_{ig}^{imp2} = \prod_{snp \ j \in g} \left[ p_{ij}^{ger} + (1 - p_g) \int_{x=0}^1 f_{beta}^{imp}(x) \left[ (1 - p_p) \cdot f_{bin}(n_{ij} - h_{ij}|x, n_{ij}) + p_p \cdot f_{bin}(h_{ij}|x, n_{ij}) \right] dx \right]$$

where  $f_{beta}^{imp}(x)$  is the beta probability density function with parameters specific to the imprinted class. Note that when a phasing error occurs in a given site, that site would seem to be expressed from the wrong gene copy. Therefore, given that a genotyping error did not occur, we draw the counts from the correct distribution with probability  $(1 - p_p)$  and from the wrong distribution with probability  $p_p$ .

Since the numbering of the two gene copies is arbitrary, the likelihood of the count data for gene  $g$  given that individual  $i$  belongs to the imprinted class follows as:

$$L_{ig}^{imp} = \frac{1}{2} L_{ig}^{imp1} + \frac{1}{2} L_{ig}^{imp2}$$

The computations for the imbalanced class are identical to those for the imprinted class, but replacing  $f_{beta}^{imp}$  with  $f_{beta}^{imb}$ , which is the distribution from which the relative expression level of the over-expressed alleles in imbalanced genes are drawn.

Estimation of the Beta distribution parameters is described in Section “*Estimation of Beta parameters*” below.

## 6.5 Per-Gene Statistics

For each gene in each tissue we compute a set of statistics to summarize different aspects of expression and imprinting across individuals.

The overall likelihood of the RNA-seq data observed for gene  $g$  in a given tissue over all individuals is a function of the parameters  $(\theta_g^{bal}, \theta_g^{imb}, \theta_g^{imp})$ :

$$L_g = \prod_{i \in individuals} [\theta_g^{bal} \cdot L_{ig}^{bal} + \theta_g^{imb} \cdot L_{ig}^{imb} + \theta_g^{imp} \cdot L_{ig}^{imp}]$$

Optimizing over  $(\theta_g^{bal}, \theta_g^{imb}, \theta_g^{imp})$  yields  $(\hat{\theta}_g^{bal}, \hat{\theta}_g^{imb}, \hat{\theta}_g^{imp})$ , the maximum likelihood estimates for these parameters:

$$(\hat{\theta}_g^{bal}, \hat{\theta}_g^{imb}, \hat{\theta}_g^{imp}) = \underset{(\theta_g^{bal}, \theta_g^{imb}, \theta_g^{imp})}{\operatorname{argmax}} L_g$$

We compute the following likelihood statistics:

$$IMPGLR_g = \frac{\max_{(\theta_g^{bal}, \theta_g^{imb}, \theta_g^{imp})} L_g}{\max_{(\theta_g^{bal}, \theta_g^{imb}, \theta_g^{imp}=0)} L_g}$$

$IMPGLR_g$  is a generalized likelihood ratio statistic that quantifies the evidence for the existence of imprinting in gene  $g$ . Specifically, it is the ratio of the maximum data likelihood when allowing for imprinting to the maximum data likelihood under the assumption that imprinting does not exist in gene  $g$ .

$$IMPLR_g = \frac{\max_{(\theta_g^{bal}=0, \theta_g^{imb}=0, \theta_g^{imp}=1)} L_g}{\max_{(\theta_g^{bal}, \theta_g^{imb}, \theta_g^{imp}=0)} L_g}$$

$IMPLR_g$  is a likelihood ratio statistic that compares the hypotheses of gene  $g$  being imprinted and not imprinted under the assumption that all individuals share the same imprinting status. Specifically, it is the ratio of the data likelihood when all individuals are imprinted to the maximum data likelihood when all individuals are allowed to be either balanced or imbalanced, but not imprinted, in gene  $g$ .

$$HETLR_g = \frac{\max_{(\theta_g^{bal}, \theta_g^{imb}, \theta_g^{imp})} L_g}{\max \left( \max_{(\theta_g^{bal}, \theta_g^{imb}, \theta_g^{imp}=0)} L_g, \max_{(\theta_g^{bal}=0, \theta_g^{imb}=0, \theta_g^{imp}=1)} L_g \right)}$$

$HETLR_g$  is a likelihood ratio statistic that quantifies the evidence for the existence of between-individuals heterogeneity in the imprinting status of gene  $g$ . Specifically, it is the ratio of the maximum data likelihood to the maximum data likelihood under the assumption that all individuals are either imprinted or not imprinted.

In the above likelihood statistics, maximum likelihood estimates for  $(\theta_g^{bal}, \theta_g^{imb}, \theta_g^{imp})$  are computed using the Expectation Maximization algorithm.

We compute the probabilities of gene  $g$  being balanced, imbalanced or imputed under the strict assumption that all individuals are either balanced, imbalanced or imputed:

$$z_g^{bal} = \frac{P^{bal} \prod_i L_{ig}^{bal}}{P^{bal} \prod_i L_{ig}^{bal} + P^{imb} \prod_i L_{ig}^{imb} + P^{imp} \prod_i L_{ig}^{imp}}$$

$$z_g^{imb} = \frac{P^{imb} \prod_i L_{ig}^{imb}}{P^{bal} \prod_i L_{ig}^{bal} + P^{imb} \prod_i L_{ig}^{imb} + P^{imp} \prod_i L_{ig}^{imp}}$$

$$z_g^{imp} = \frac{P^{imp} \prod_i L_{ig}^{imp}}{P^{bal} \prod_i L_{ig}^{bal} + P^{imb} \prod_i L_{ig}^{imb} + P^{imp} \prod_i L_{ig}^{imp}}$$

In the equations above  $P^{bal}$ ,  $P^{imb}$ ,  $P^{imp}$  are the prior probabilities of a given gene being balanced, imbalanced and imprinted. We set these probabilities to 0.8, 0.19 and 0.01, respectively. These are conservative estimates, which are meant to produce a gross scaling of the probabilities of the three classes.

$\tau_g$  - mean fraction of higher-frequency allele (either ref or alt) out of total counts, computed over all informative sites in gene  $g$

$\phi_g$  - mean fraction of reference counts out of total counts, computed over all informative sites in gene  $g$

## 6.6 Per-gene, per-individual Statistics

In addition to the statistics summarizing information over all individuals, we compute a series of statistics for each individual in a given gene and tissue. We denote by  $P^{bal}$ ,  $P^{imb}$ ,  $P^{imp}$  the prior probabilities of a given gene being balanced, imbalanced and imprinted in any given individual. We set these probabilities to 0.8, 0.19 and 0.01, respectively, identically to the per-gene prior probabilities as described in “Per-Gene Statistics” above.

We compute the conditional probabilities of gene  $g$  in individual  $i$  belonging to each of the three classes as follows:

$$z_{ig}^{bal} = \frac{P^{bal} L_{ig}^{bal}}{P^{bal} L_{ig}^{bal} + P^{imb} L_{ig}^{imb} + P^{imp} L_{ig}^{imp}}$$

$$z_{ig}^{imb} = \frac{P^{imb} L_{ig}^{imb}}{P^{bal} L_{ig}^{bal} + P^{imb} L_{ig}^{imb} + P^{imp} L_{ig}^{imp}}$$

$$z_{ig}^{imp} = \frac{P^{imp} L_{ig}^{imp}}{P^{bal} L_{ig}^{bal} + P^{imb} L_{ig}^{imb} + P^{imp} L_{ig}^{imp}}$$

We count as balanced/imbalanced/imprinted any individual whose  $z_{ig}^{bal}/z_{ig}^{imb}/z_{ig}^{imp}$  probability exceeds 0.7, respectively. We compute these statistics twice: First considering all individuals with at least one informative SNP in gene  $g$ , and second considering only individuals with at least two informative SNPs. We denote these sets of statistics as (bal1,imb1,imp1) and (bal2,imb2,imp2), respectively. Compared with the first set, the second one includes fewer but more confident counts. Finally, the statistics total1, total2 give the total number of individuals with at least 1,2 informative SNPs in gene  $g$ ,

respectively. Note that not all individuals will be classified into a category as there must be substantial evidence to exceed the threshold, and therefore  $bal1+imb1+imp1$  is often smaller than  $total1$  (and same for  $total2$ ).

## 6.7 Estimation of Beta parameters

For the parameter estimation procedure only we assume a simplistic mixture model in which the expression pattern of every gene can be classified into one of three different classes (BAL, IMB, IMP). Each class is characterized by a Beta distribution, from which the fraction of the over-expressed allele counts are drawn for the relevant sites. The parameters of the three classes are denoted as  $(\alpha_{bal}, \beta_{bal})$ ,  $(\alpha_{imb}, \beta_{imb})$  and  $(\alpha_{imp}, \beta_{imp})$ , respectively. The fraction of genes belonging to each class are denoted as  $q^{bal}$ ,  $q^{imb}$  and  $q^{imp}$ , respectively.

Given the gene's class and the number of counts observed in the relevant sites, the reference counts are assumed to be drawn independently, regardless of the individual of origin, and discarding phase information. The likelihood of the count data as a function of the mixture model parameters is computed as

$$L(R, N|q, \alpha, \beta) = \prod_{\substack{g \in \\ genes}} \sum_{\substack{class \in \\ \{bal, imb, imp\}}} q^{class} \prod_{i \in individuals} \prod_{\substack{snps \\ j \in g}} [p_{ij}^{gerr} + (1 - p_g) p_{ij}^{class}]$$

In the equation above R are the ref counts and N are the total counts, provided per individual and per site, and  $p_{ij}^{gerr}$  is computed as explained in section “*Model Computations*” above.  $p_{ij}^{class}$  is computed per site and per class as follows:

$$p_{ij}^{bal} = P(r_{ij} | \alpha_{bal}, \beta_{bal}, n_{ij}) = \int_{x=0}^1 f_{beta}^{bal}(x) \cdot f_{bin}(r_{ij} | x, n_{ij})$$

$$\begin{aligned} p_{ij}^{imb} &= P(r_{ij} | \alpha_{imb}, \beta_{imb}, n_{ij}) \\ &= \frac{1}{2} \int_{x=0}^1 f_{beta}^{imb}(x) \cdot f_{bin}(r_{ij} | 1-x, n_{ij}) + \frac{1}{2} \int_{x=0}^1 f_{beta}^{imb}(x) \cdot f_{bin}(r_{ij} | x, n_{ij}) \end{aligned}$$

$$\begin{aligned} p_{ij}^{imp} &= P(r_{ij} | \alpha_{imp}, \beta_{imp}, n_{ij}) \\ &= \frac{1}{2} \int_{x=0}^1 f_{beta}^{imp}(x) \cdot f_{bin}(r_{ij} | 1-x, n_{ij}) + \frac{1}{2} \int_{x=0}^1 f_{beta}^{imp}(x) \cdot f_{bin}(r_{ij} | x, n_{ij}) \end{aligned}$$

We use the Stochastic Expectation Maximization (SEM) algorithm (Celeux and Diebolt 1985) to estimate  $q$ ,  $\alpha$  and  $\beta$ . SEM is a modification of the EM algorithm in which the hidden variables are simulated according to their posterior probabilities, instead of being replaced by their expectations. SEM has been shown to produce stable estimates in similar problems.

We declare the following hidden indicator variables:

$$z_{ig}^{gerr} = \begin{cases} 1 & \text{if a genotyping error occurred in snp } j \text{ in individual } i \\ 0 & \text{otherwise} \end{cases}$$

$$z_g^{bal} = \begin{cases} 1 & \text{if gene } g \text{ belongs to the balanced class} \\ 0 & \text{otherwise} \end{cases}$$

$$z_g^{imb} = \begin{cases} 1 & \text{if gene } g \text{ belongs to the imbalanced class} \\ 0 & \text{otherwise} \end{cases}$$

$$z_g^{imp} = \begin{cases} 1 & \text{if gene } g \text{ belongs to the imprinted class} \\ 0 & \text{otherwise} \end{cases}$$

Initialization: We set  $q^{(0)} = (q^{bal(0)}, q^{imb(0)}, q^{imp(0)})$  to  $(1/3, 1/3, 1/3)$ . In order to initialize the Beta parameters, we compute  $\text{abs}(\frac{r_{ij}}{n_{ij}} - 0.5)$  for all sites in the dataset, and use the first decile to set  $(\alpha^{bal(0)}, \beta^{bal(0)})$ , the ninth decile to set  $(\alpha^{imb(0)}, \beta^{imb(0)})$ , and the tenth decile to set  $(\alpha^{imp(0)}, \beta^{imp(0)})$ . The motivation here is to initialize the distributions to reflect balanced, moderately imbalanced and highly imbalanced expression patterns, respectively. Given the sites in the relevant decile, the initialization is performed by optimizing each  $(\alpha, \beta)$  pair using an interior-point procedure.

Iteration: In the  $i$ th iteration of the algorithm we perform the two following stages:

1. Drawing from expectation:
  - a. Draw the hidden variables  $z_g^{bal}, z_g^{imb}, z_g^{imp}$  for every gene  $g$  from their posterior multinomial distributions given  $q^{i-1}$  and  $(\alpha, \beta)^{(i-1)} = (\alpha^{bal(i-1)}, \beta^{bal(i-1)}, \alpha^{imb(i-1)}, \beta^{imb(i-1)}, \alpha^{imp(i-1)}, \beta^{imp(i-1)})$ .
  - b. Draw the hidden variables  $z_{ij}^{gerr}$  for every individual  $i$  and for every SNP  $j$ , given the gene classifications drawn in 1(a).
2. Maximization: Set  $q^i$  and  $(\alpha, \beta)^i$  by optimizing over the resulting complete data likelihood. The Beta parameters are obtained using an interior point procedure.

We ran the above procedure on the Geuvadis dataset. Following twenty iterations we observed that the absolute value of change in all parameters was smaller than 0.01, and used these estimates as the model's parameters. The parameter values are  $(\alpha_{bal}, \beta_{bal}) = (45.5, 44.5)$ ,  $(\alpha_{imb}, \beta_{imb}) = (6.3, 5.7)$ ,  $(\alpha_{imp}, \beta_{imp}) = (0.64, 0.15)$ .

## 6.8 Classification

The complete results of our approach applied to each data set are given in Supplementary Tables 3-5. Using these data we classified a set of imprinted genes in each tissue. Given the lack of parental inheritance information we took a conservative approach, requiring substantial evidence from multiple statistics and filters in order to classify a gene as imprinted. However, there were many genes that had moderate evidence of imprinting and these results can be combined with future studies in order to determine their validity. Below we describe the thresholds for classification in each of the four categories Imprinted, Biallelic, consistent with Imprinted, and consistent with Biallelic. Five genes classified as imprinted were removed based on validation results from the family or long-read RNA-seq analyses (see sections 1 and 3).

### Imprinted

For identification of novel genes we required at least five individuals and two SNPs. For at least one SNP both alleles had to occur as the monoallelically expressed allele in at least one individual. We did not allow for novel heterogeneously imprinted genes (**hetlr** < 1.0), but removed this requirement if the gene was previously identified as imprinted in humans. If all of these filters were passed a gene was classified as imprinted if  $\theta_g^{imp} > 0.7$ ,  $\theta_g^{bal} < 0.05$ , and **impglr** > 31.52 to account for the multiple hypotheses via a conservative Bonferoni correction for all genes/tissues examined (0.05/N=2532972 gene-tissue pairs examined). For the smaller set of previously identified genes we required  $\theta_g^{imp} > 0.5$  and **impglr** > 13.7 (0.05/N=233 known gene-tissue pairs examined). The putatively imprinted genes defined according to these criteria are listed in Table S4. However, due to lack of comprehensive family data needed to confirm a parent of origin effect and formally define a false discovery rate obtained with these thresholds, and because the **glr** statistics are not guaranteed to be chi-square distributed due to the boundary condition of  $\theta_g^{imp} = 0$  under the null, in the final analysis described in the main text, focusing on biological variation in imprinting, we used a more stringent threshold. Specifically, for novel genes, we required **impglr** > 50 if  $\theta_g^{imp} = 1.00$  and **impglr** > 100 otherwise. For previously identified genes we required **impglr** > 40.

### Biallelic

We next examined each of these imprinted genes in all tissues to determine, which tissues showed strong evidence of biallelic expression. We classified a gene as biallelic if it was not imprinted, and at least half of the individuals were classified as balanced by our method. Recall that individuals are only classified as biallelic if  $z_{ig}^{bal} > 0.7$  and that not all individuals are classified as any of balanced, imbalanced or imprinted. That is, the method will give an unknown classification for ambiguous individuals with a small number of reads.

For genes with a small number of individuals, SNPs, or reads, there was not enough information to classify genes *de novo* as either imprinted or biallelic according to the metrics above. However, we did examine genes with lower thresholds conditional on the existence of a classified imprinted gene in at least one tissue. We created two additional categories “consistent with Imprinted” and “consistent with Biallelic”:

### consistent with Imprinted

These are the set of genes in which the statistical model suggested imprinting, but there was not enough evidence for classification. We required that  $\theta_g^{imp}$  accounted for 90% of the population of individuals. We used the same statistic,  $\theta_g^{imp}$ , as in the classification procedure, but did not include a cutoff for the **impglr** test statistic allowing for individuals with low read counts. For example, a gene whose data consists of a single individual with read counts 20 *ref* and 0 *alt* at a single SNP would be classified into this category.

### consistent with Biallelic

These are the set of genes in which the statistical model suggested biallelic expression, but there was not enough evidence for classification. We required that the combined set of biallelic and imbalanced individuals, as determined by the  $z_{ig}^{bal}$  and  $z_{ig}^{imb}$  statistics, accounted for at least 50% of the population of classified individuals.

## **7. Symbol and naming reference**

Names and symbols used in this section and Tables S3-S5:

impglr – generalized LR statistic, quantifies the gain in likelihood obtained by allowing for imprinting in this gene (full description in supp methods)

implr - LR statistic, compares the assumption that all individual are imprinted to the assumption that none are (full description in supp methods)

hetlr – generalized LR statistic, quantifies the gain in likelihood obtained by allowing for heterogeneity in imprinting status across individuals (full description in supp methods)

$\hat{\theta}_g^{bal}, \hat{\theta}_g^{imb}, \hat{\theta}_g^{imp}$  – estimates for fraction of balanced, imbalanced and imprinted individuals

$z_g^{bal}, z_g^{imb}, z_g^{imp}$  - probabilities of the gene being balanced, imbalanced and imprinted in all individuals

bal2 – number of individuals with at least two informative SNPs who are classified as balanced

imb2 – number of individuals with at least two informative SNPs who are classified as imbalanced

imp2 – number of individuals with at least two informative SNPs who are classified as imprinted

total2 – number of individuals with at least two informative SNPs

bal1 – number of individuals with at least one informative SNP who are classified as balanced

imb1 – number of individuals with at least one informative SNP who are classified as imbalanced

imp1 – number of individuals with at least one informative SNP who are classified as imprinted

total1 – number of individuals with at least one informative SNP

both – a SNP monoallelic for both alleles was observed (yes/no)  
 known – a known imprinted gene (yes/no)  
 RME – a known random monoallelic expression gene (yes/no)  
 eQTLt – tissues in which known strong eQTLs exist  
 eQTLv – linear regression coefficient from allelic ratio  $\sim$  het|hom eQTL genotype

indn – number of individuals with at least one informative SNP  
 snpn – number of SNPs which are informative in at least one individual  
 indn2 – number of individuals with at least two informative SNP  
 snpn3 – number of SNPs which are informative in at least three individuals  
 $\tau_g$  – mean fraction of higher-frequency allele (either ref or alt) out of total counts, computed over all sites in gene  $g$   
 $\varphi_g$  – mean the fraction of reference counts out of total counts, computed over all sites in gene  $g$

## 8. Known Imprinted Genes in Human and Mouse

The set of known imprinted genes in human and mouse were collected from the Otago database (Morison et al. 2001) by searching under category for status “imprinted” (Table S6). Provisional genes and genes with conflicting evidence were not considered amongst the known set of genes. We also added all genes from the Otago pdf 1101Summary-table.pdf, and human non-provisional “imprinted” genes from geneimprint.org. In the event that these data sources are not up to date with the latest literature, some of our novel genes may in fact be previously known.

We compared all identified imprinted genes with imprinting status in the mouse as retrieved from the Otago database and the results are shown in Figure S9. The results indicate that while there exists a high overlap between human and mouse imprinted genes, there are also uniquely human/mouse imprinted genes. However, not all tissues/developmental stages have been examined for imprinting.

## 9. Additional notes on specific genes

In this section, we briefly discuss the imprinting patterns of individual genes, based on additional inspection, especially of the novel imprinted genes discovered in this study, and other noteworthy observations.

- *IGF2*: We verified with visual inspection of both the long- and short-read RNA-seq data that the *IGF2* locus does not show signs of ambiguous transcription that could explain the different expressed allele in brain and muscle. Specifically, RNA-seq reads in the *IGF2* region do not overlap the nearby *H19* gene.
- *INPP5F*: The 3' exons of *INPP5F* overlap *INPP5F\_V2*, which is annotated as a transcript of *INPP5F* according to both Gencode and RefSeq even though it is a previously known imprinted retrogene inside the non-imprinted *INPP5F* (Monk et al. 2011). Because of this, and all of our ASE data from *INPP5F* being from the region



overlapping *INPP5F\_V2*, we treated *INPP5F\_V2* as a separate gene (except in gene expression level analysis), observing signs of imprinting in several tissues. However, the long read data indicated expression both from *INPP5F* and *INPP5F\_V2*, and fully distinguishing these transcripts is not possible in our data. Thus, lack of imprinting or a leaky signal (Supplementary Figure 1a) could be due to expression from the non-imprinted *INPP5F*.

- *SYCE1*, *THEGL*, and *MAGI2* have not been classified as imprinted in previous studies, and in our analysis there is strong support for imprinting only in the Geuvadis or Gencord cell line data sets. For the sake of consistency, these genes are included in this study, but we note that their imprinting status in primary tissues remains unclear.
- *SNHG14* is in the middle of a well-known imprinted region, but the annotation of the transcripts in this region remains unclear. We observe monoallelic transcription that is consistent with the Gencode annotation of *SNHG14*, but future work is needed to describe the full gene annotation of this region.
- *NLRP2* is expressed in a monoallelic manner, but the trio data indicates non-parental origin of monoallelic expression (Supplementary Table 7).
- *LPAR6* is a putative novel imprinted gene that is located in an intron of a previously identified *RB1* gene. In our data, *LPAR6* shows a stronger signal of imprinting than *RB1* – although the signal is particularly strong in LCLs rather than primary tissue samples.

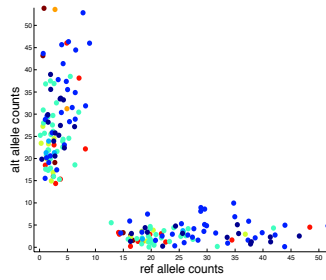

**Fig. S1.**

An example of partial imprinting in the *INPP5F\_V2* in Gencord fibroblasts where the silenced allele is expressed albeit in a lower level. The plot depicts shows the alt vs ref allele counts for all SNPs and all individuals. Different colors indicate different SNPs.

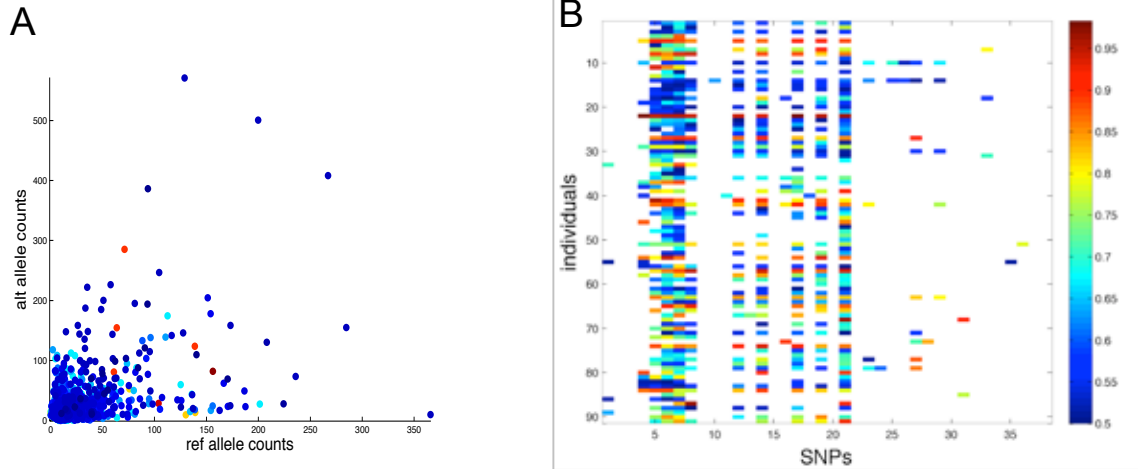

**Fig. S2.**

Random monoallelic expression (RME) manifested in the in Geuvadis LCL dataset. The gene P2RX5 was found to exhibit RME (Gimelbrant et al. 2007). A) shows the alt vs ref counts (as explained in Fig. S1). Figure B gives, for every heterozygous site with coverage  $\geq 30$ , the relative frequency of the over-expressed allele (a number between 0.5 and 1). The monoallelic sites tend to appear in specific individuals, in whom the clonality level is presumably high.

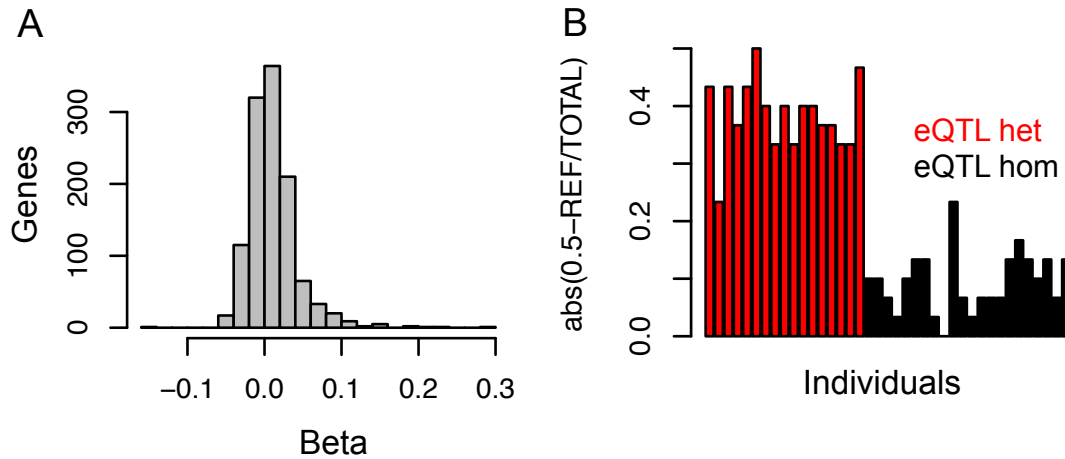

**Fig. S3.**

eQTL effects on monoallelic expression. Regulatory variants (eQTLs) are expected to lead to allelic imbalance in individuals that are heterozygous for eQTLs (max 50% of total). We investigated this in eQTL genes (identified by GTEx Consortium) by selecting one ASE site per gene per individual  $i$ , calculating allelic imbalance of that site as  $a_i = (|0.5 - \text{REF}/\text{TOTAL}|)$ , and modeling it as  $a_i = \beta g_i + e$  where  $g_i$  is an indicator variable for whether the individual is heterozygous for the eQTL variant. A) shows the distribution of  $\beta$  from that model, showing that for most eQTLs, the effect of eQTLs on ASE is small. Other tissues show similar distributions. B) shows the pattern of allelic imbalance in the gene with the highest beta in thyroid, ENSG00000144115, with eQTL heterozygotes (red) having nearly monoallelic expression compared to homozygotes (black). Note that this is the worst case example rather than a typical eQTL effect on ASE. Altogether, an eQTL signal could be confused for a signal of imprinting only if the eQTL is extremely strong, has a high minor allele frequency, and none of the  $\geq 50\%$  of individuals homozygous for the eQTL (thus lacking eQTL-induced ASE) have any heterozygous sites for ASE analysis. We did not find these patterns in our imprinted genes.

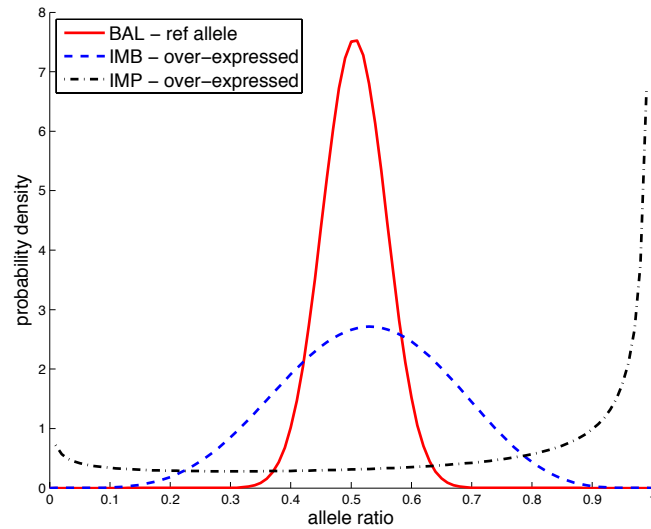

**Fig. S4.**

Three Beta distributions characterize the three expression classes of the model. Balanced class: The relative frequency of the reference allele is sampled from a Beta distribution concentrated around even expression, with a slight bias towards the reference allele. Imprinted class: The relative frequency of the allele residing on the over-expressed gene copy is sampled from a distribution strongly shifted towards 1. Imbalanced class: The relative frequency of the allele residing on the over-expressed gene copy is sampled from a high-variance Beta distribution shifted towards 1. Note that according to this distribution, it is common for an allele residing on the over-expressed gene copy to have an allele ratio less than 0.5. This situation often occurs in practice due to different biological and technical effects that cause inconsistency in imbalance levels along the gene.

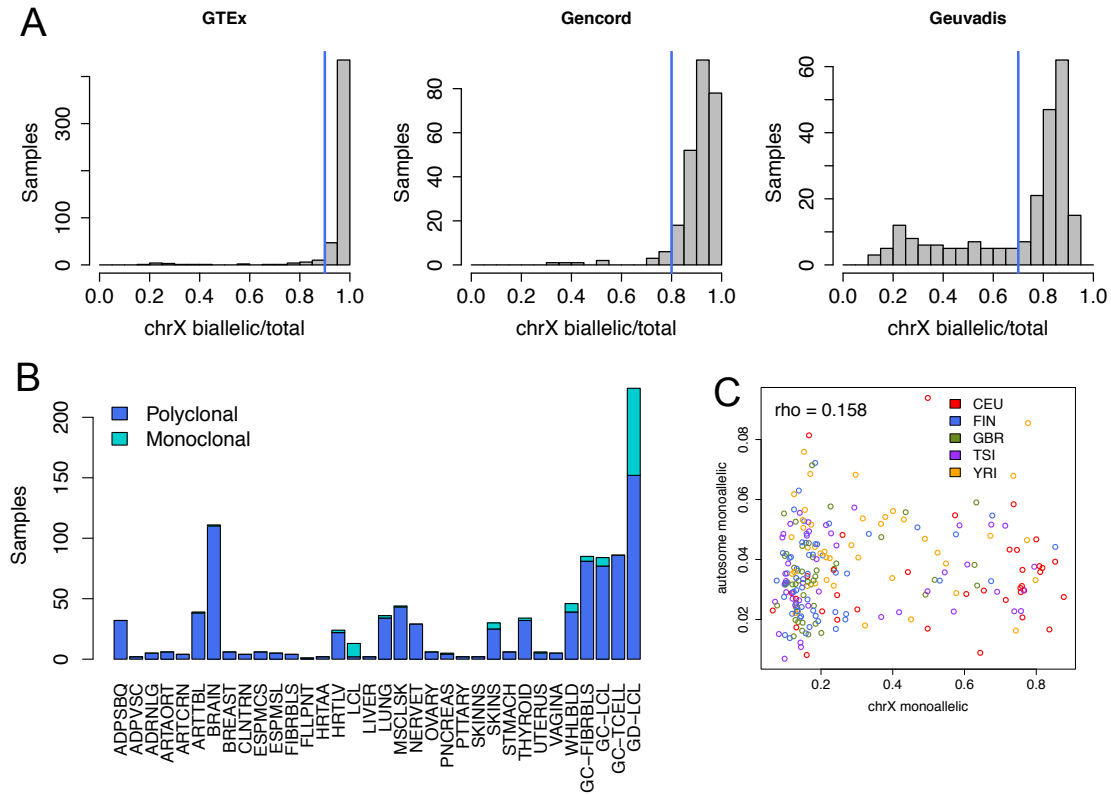

**Fig. S5.**

Clonality of samples as assessed from X-chromosome data. A) shows histograms of the proportion of biallelic sites in the X-chromosome per sample, in the three data sets used in this study. Different genotyping platforms and RNA-seq coverage make the exact proportions differ between the data sets; thus we estimated a separate threshold for each dataset (shown in blue) for a sample to be considered potentially monoclonal. (B) shows this breakdown for each tissue. The LCLs of both GTEx and Geuvadis data sets have a substantial degree of clonality. (C) shows the very slight correlation of the degree of clonality from chrX and overall proportion of ASE in Geuvadis data. This shows that genome-wide ASE is not driven by epigenetic effects that are inherited in clonal cell lines. Furthermore, the differences between populations show the much higher degree of clonality in the CEU and YRI cell lines that are much older than the other cell lines (Coriell; personal communication).



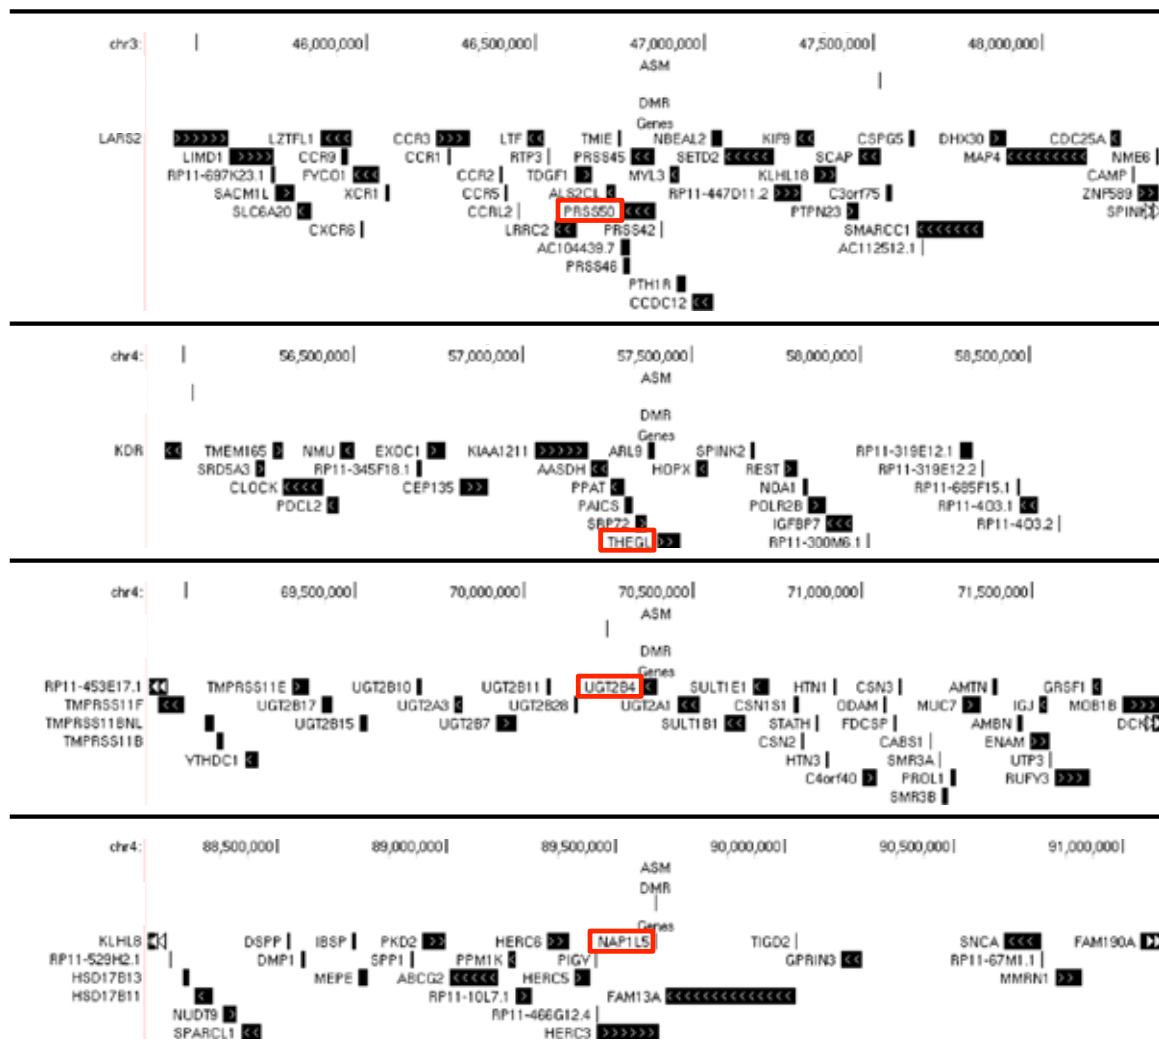



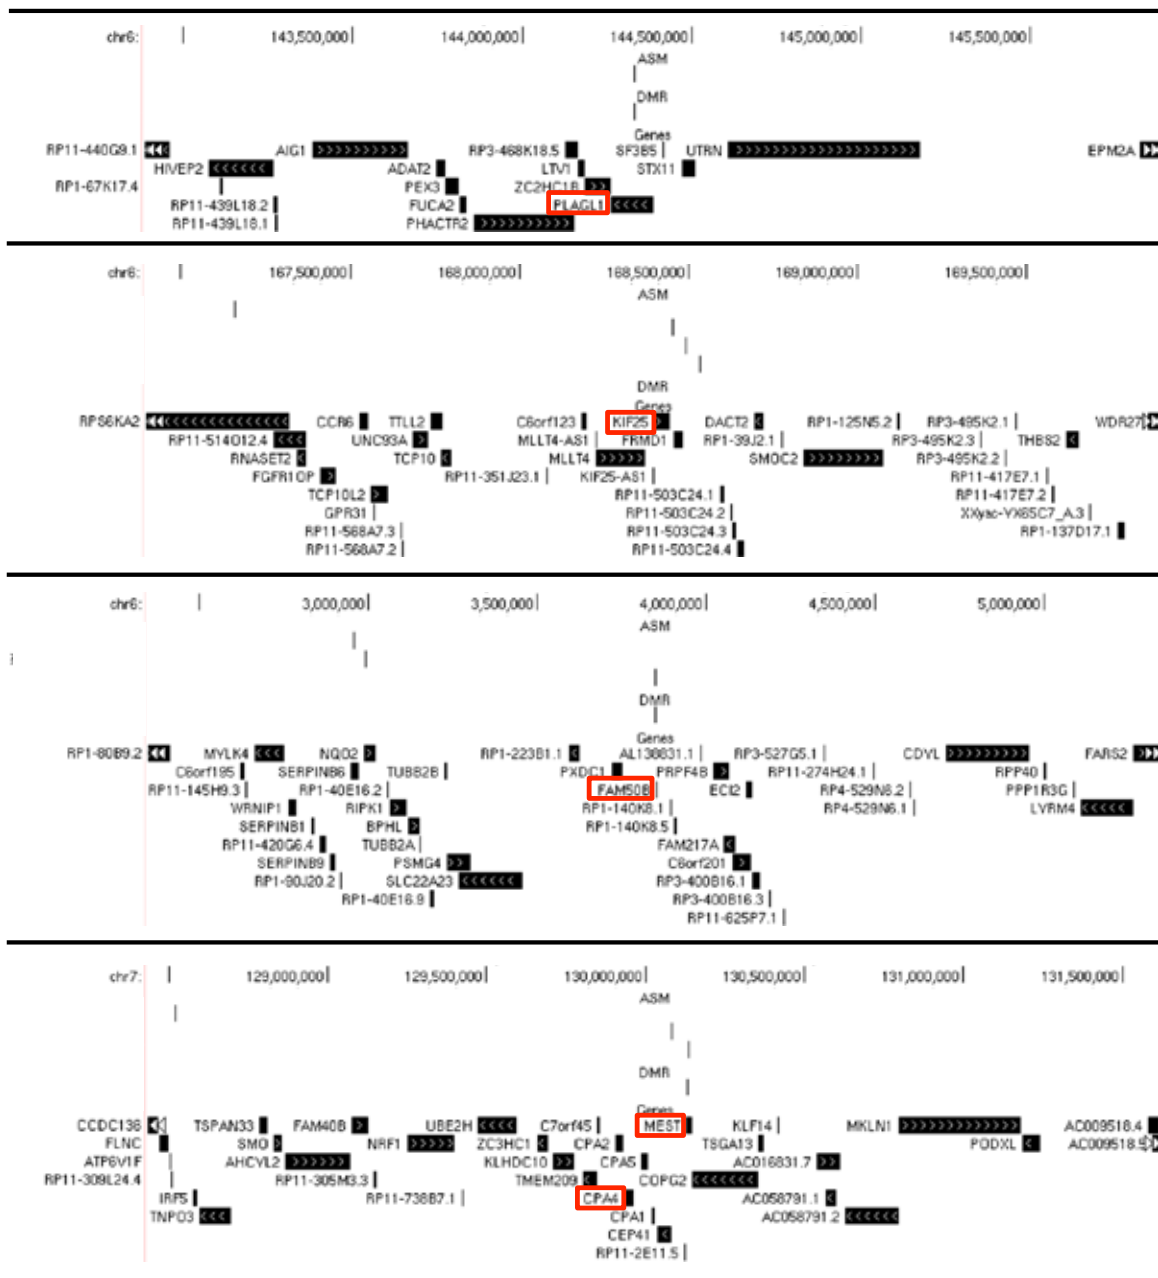

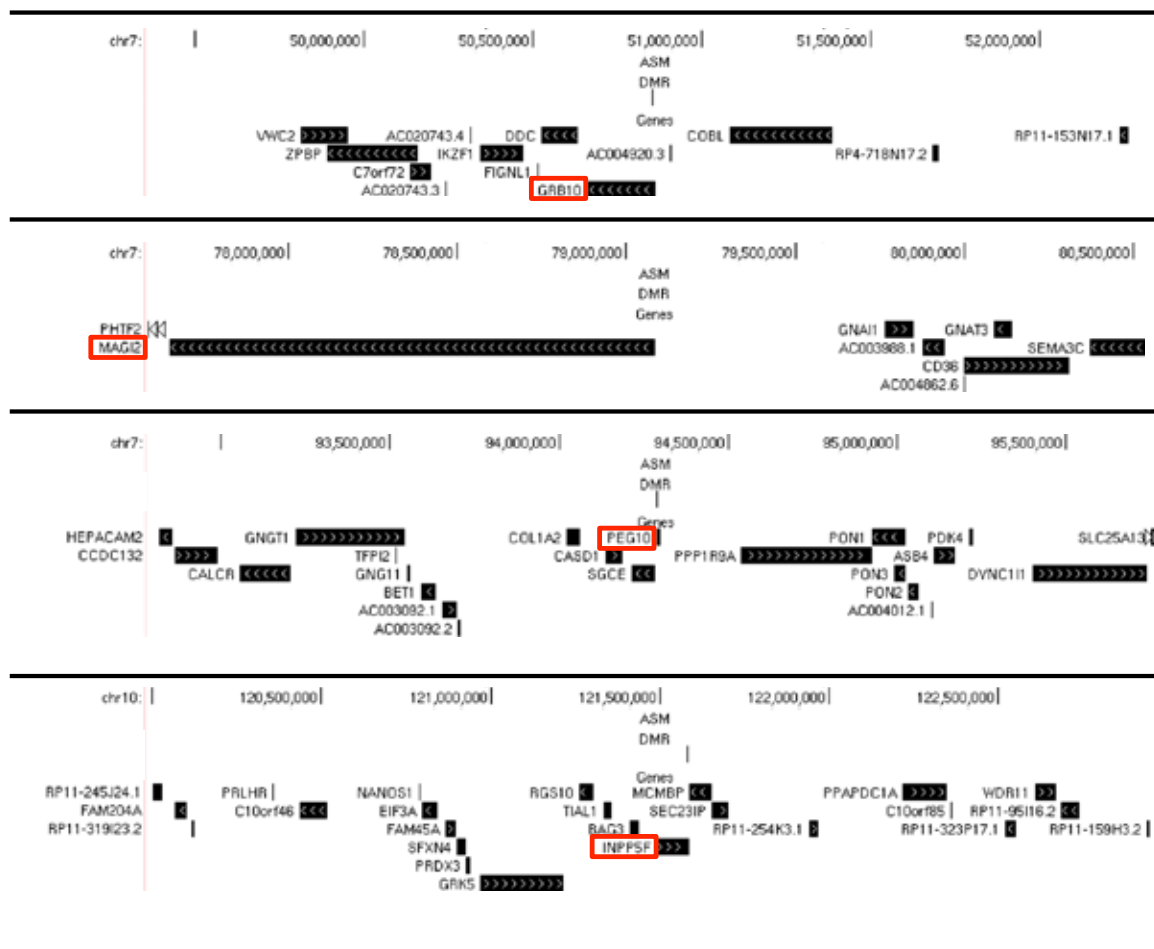

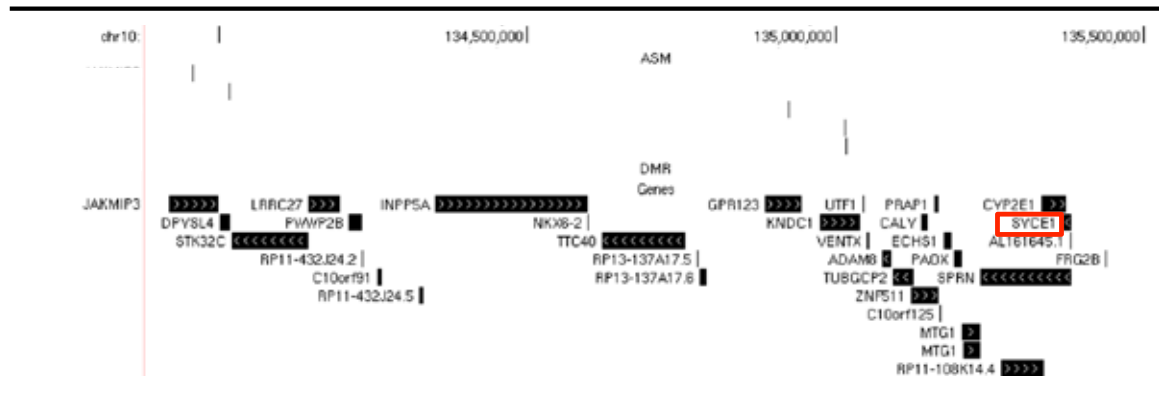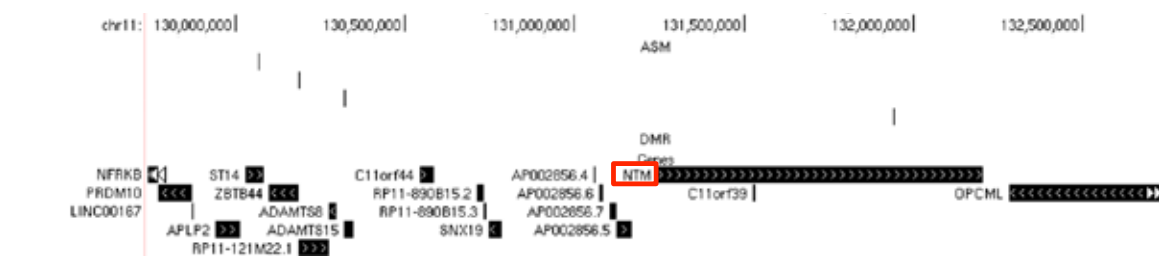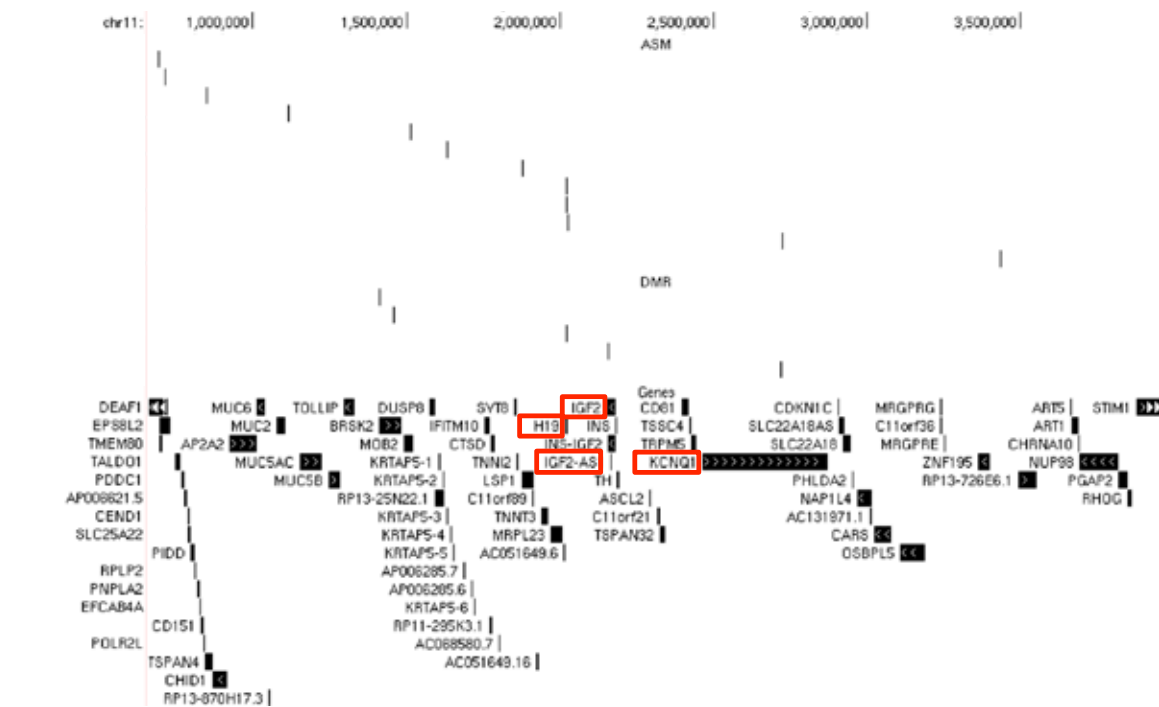

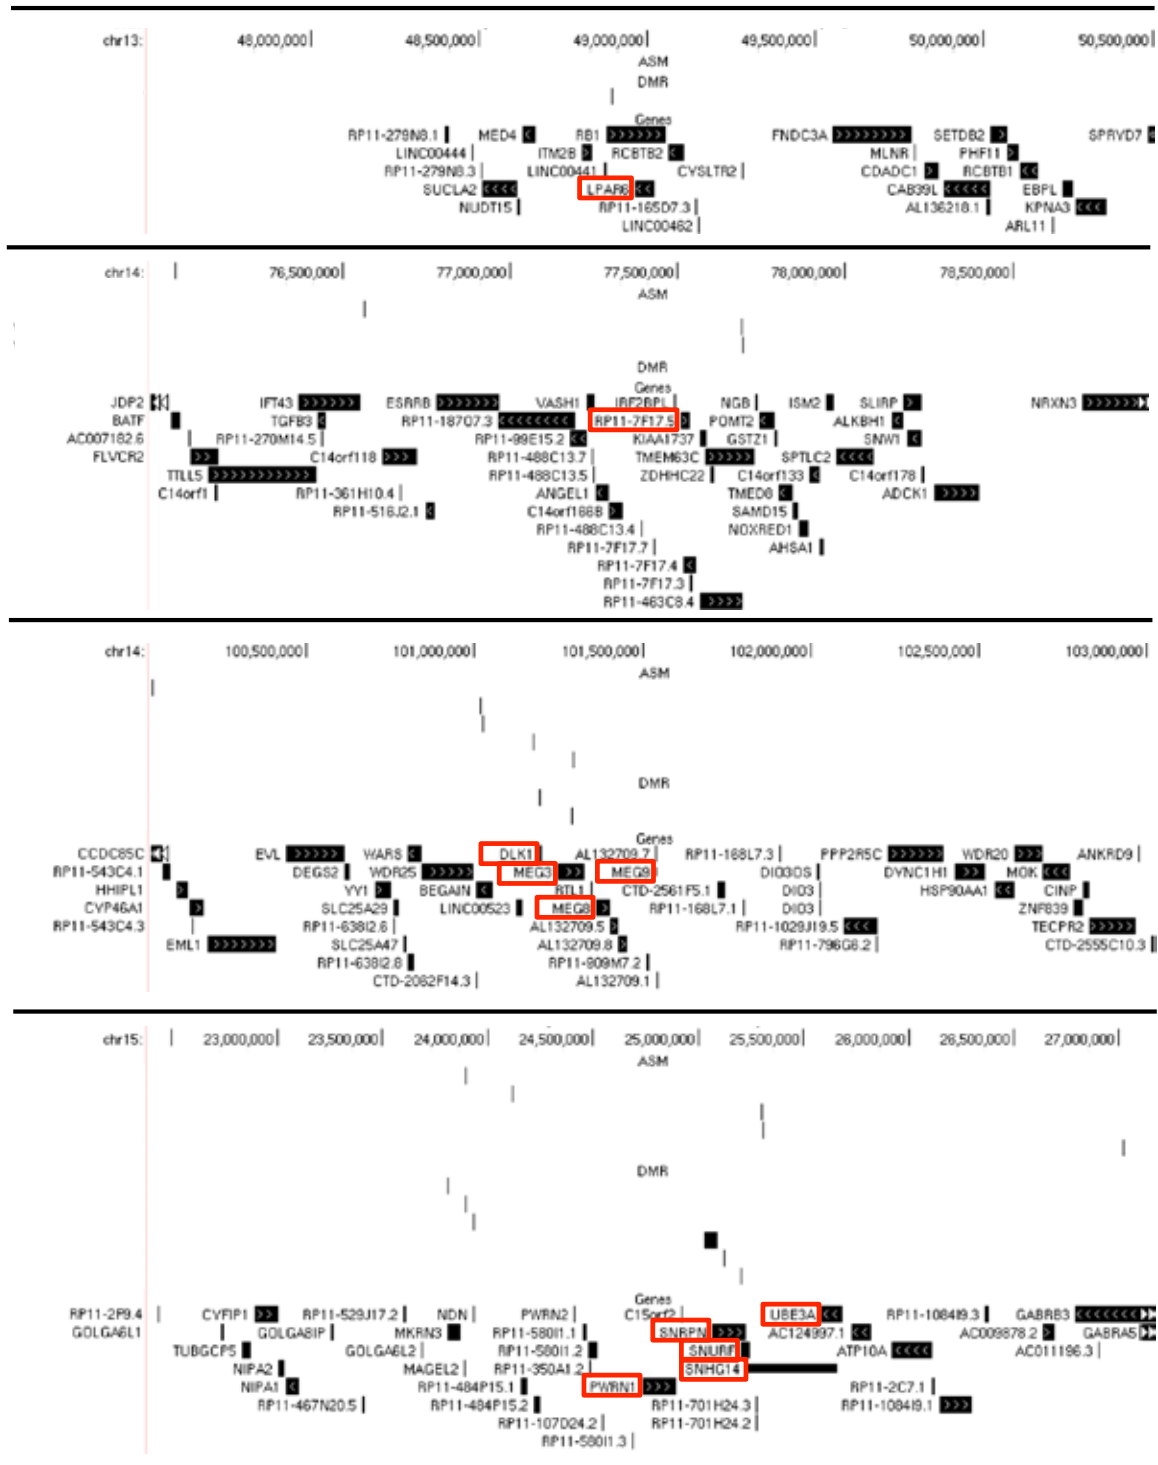

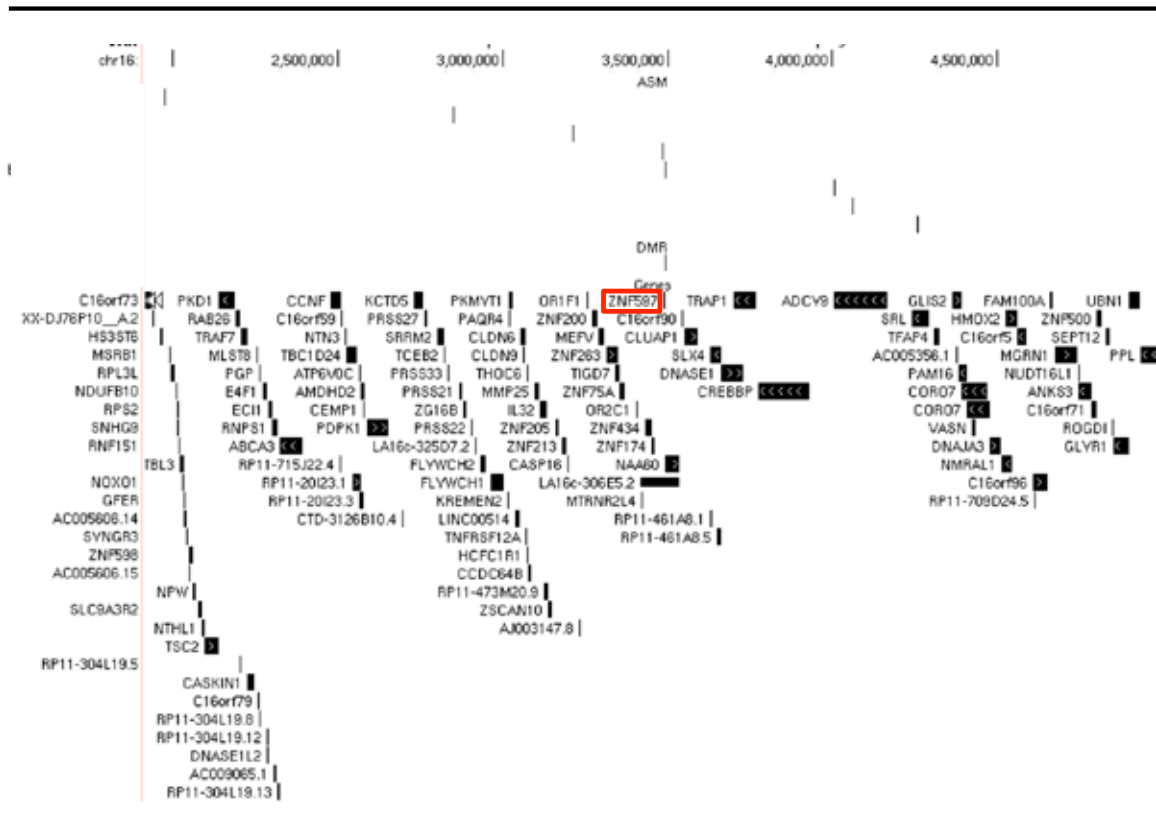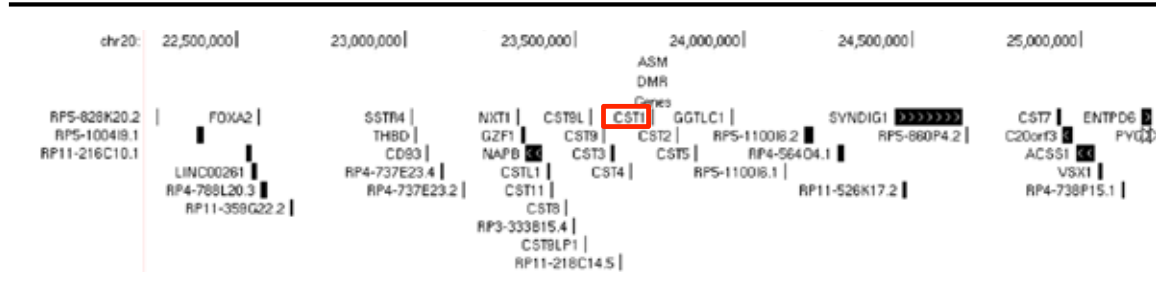

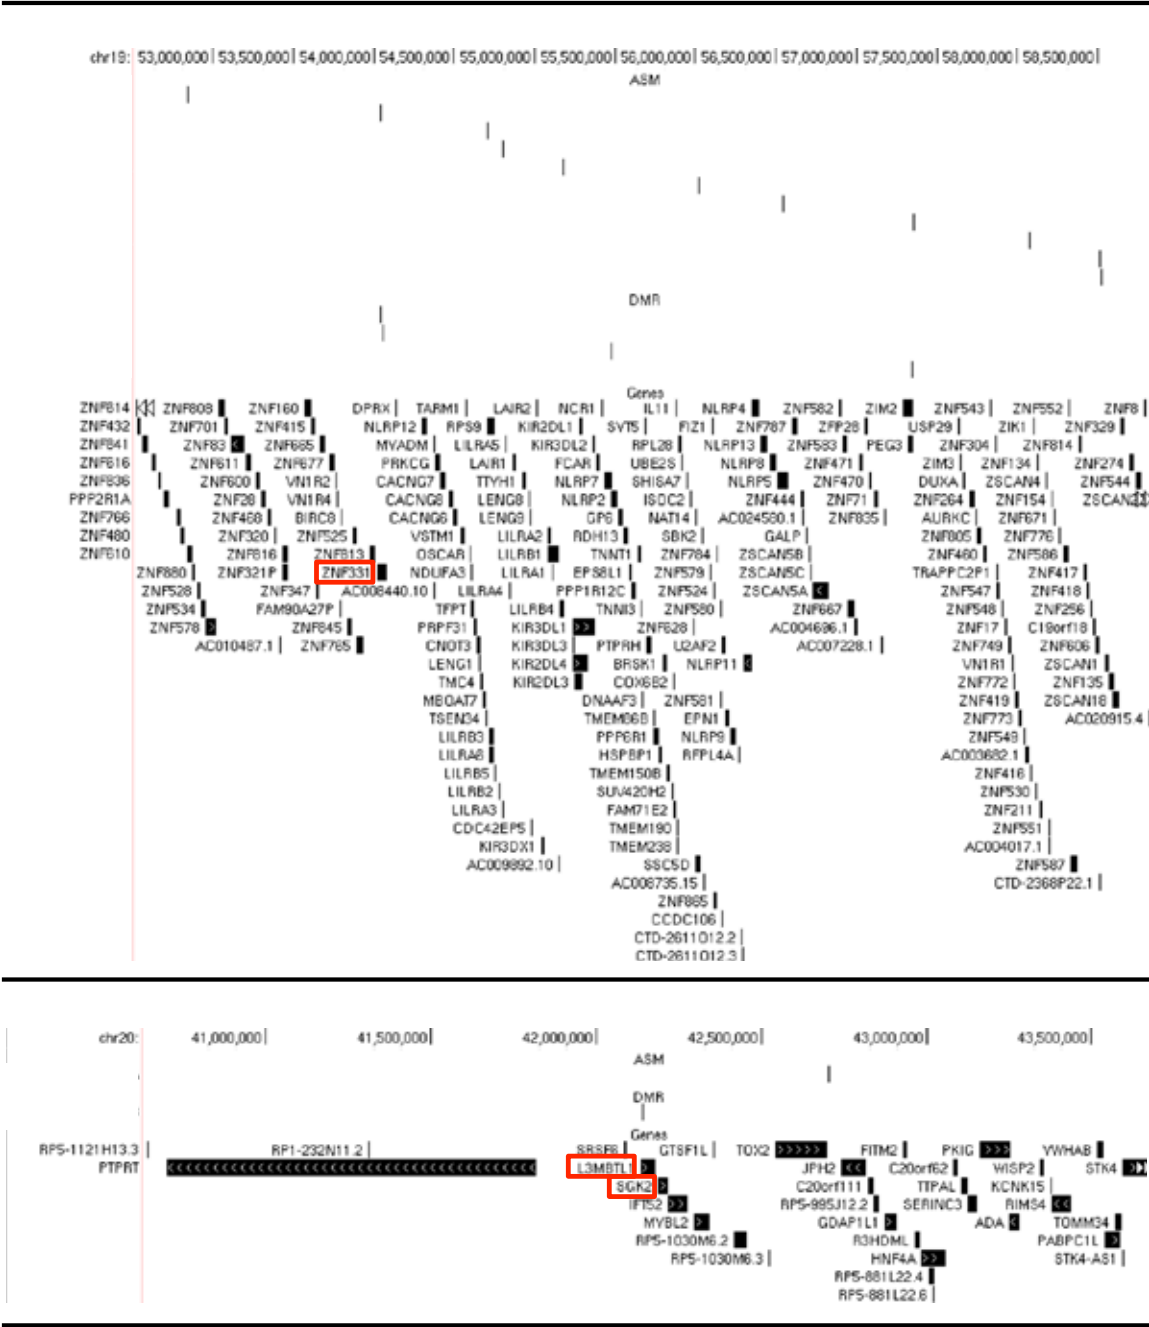

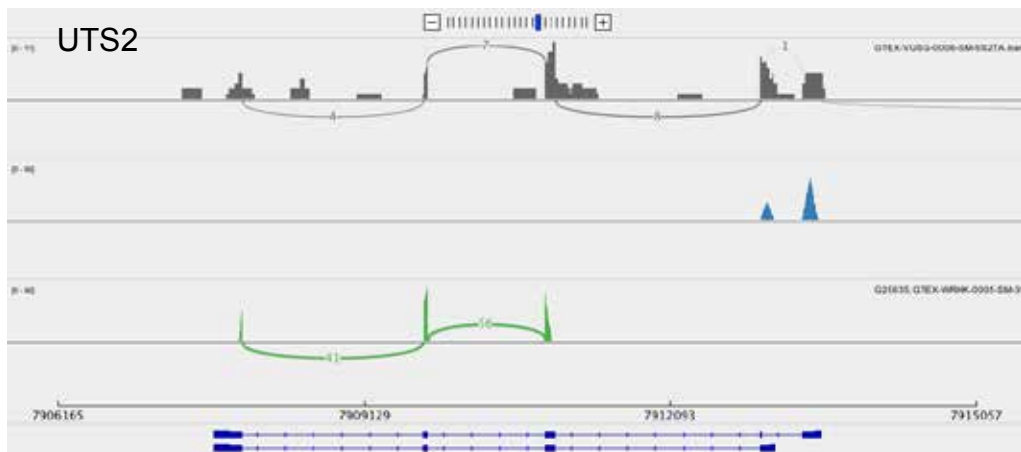

Fig. S7. Transcript structure in the novel or provisional imprinted genes, shown as a sashimi plot for one sample for each gene, based on GTEx data. The top row shows the coverage and splicing (loops with numbers) based on all long-read 2x250 bp RNA-seq reads in the region. The middle row shows reads that carry the reference allele of heterozygous sites, and the bottom shows reads that carry the alternative allele of heterozygous sites. The allelic read data is with 2x250 bp reads of the same sample as the full coverage track, when there was a long-read sample with a heterozygous SNP (these are marked with a red top row). Otherwise allelic data is from 2 x 75 bp reads using different samples from the same tissue for the full coverage track and the allelic read tracks (these are marked with a grey top row). The gene annotation in the bottom is Refseq, which is incorporated in IGV; while the rest of our analysis is based on Gencode v12, these are typically very similar, and it is known that neither is perfect.

The plots are shown for UTS2, PPIEL, DIRAS3, PRSS50, UGT2B4, KIF25, SYCE1, NTM, LPAR6, RP11-7F17.7, MEG9, SNHG14, ZNF331, NLRP2, CST1, and finally as an example of an excluded gene, RP11-701H24.3. The NTM gene is too big to be shown in its entirety, and for some genes, two plots are shown to capture the entire transcripts. Refseq gene annotation is lacking for RP11-7F17.7 and SNHG14, but the data are consistent with the Gencode annotation used in the rest of the analysis. MAGI2 and THEGL are not shown because they are not imprinted in GTEx data, but their transcript structure appears consistent with the annotation. This was not the case for RP11-701H24.3, LA16c-306E5.2, LA16c-306E5.2, and RP11-395B7.2, which were excluded from downstream analysis. The transcript annotations for the last three are too large to be shown as a plot.

(Continues on the next 6 pages)

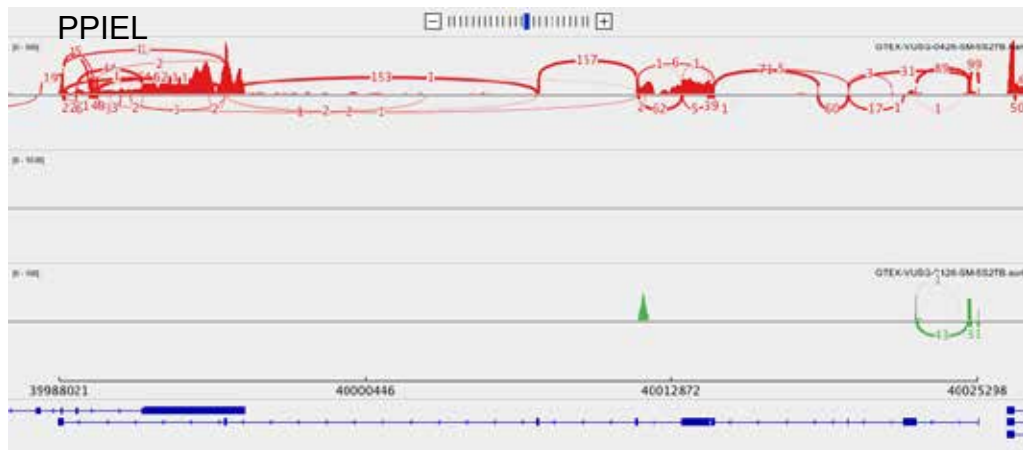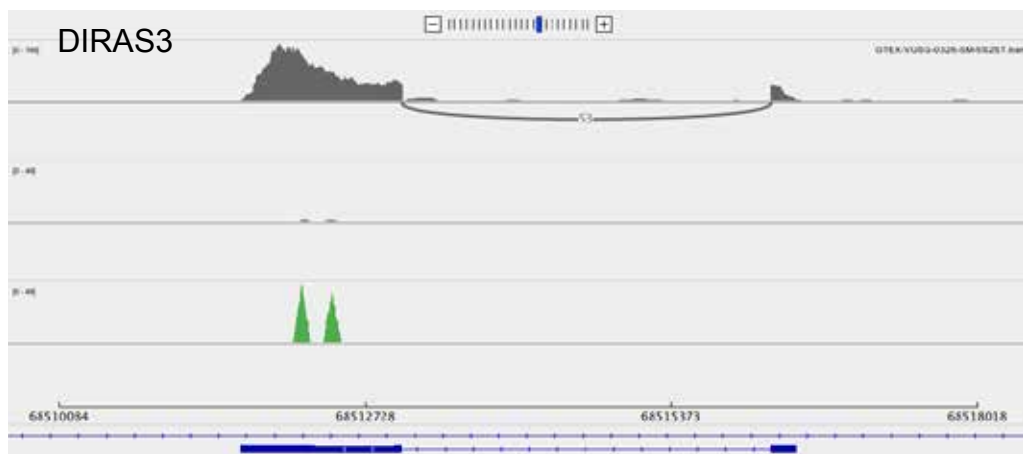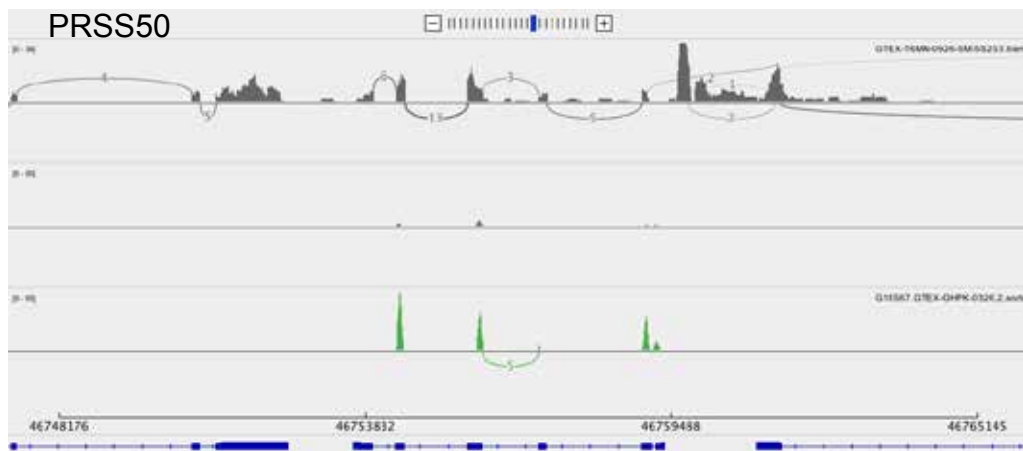



# UGT2B4

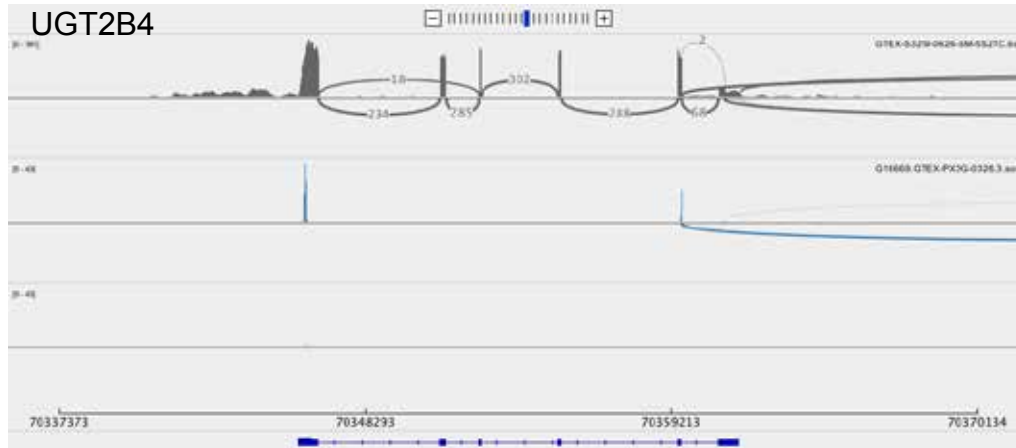

## UGT2B4 – unannotated putative novel 5' end

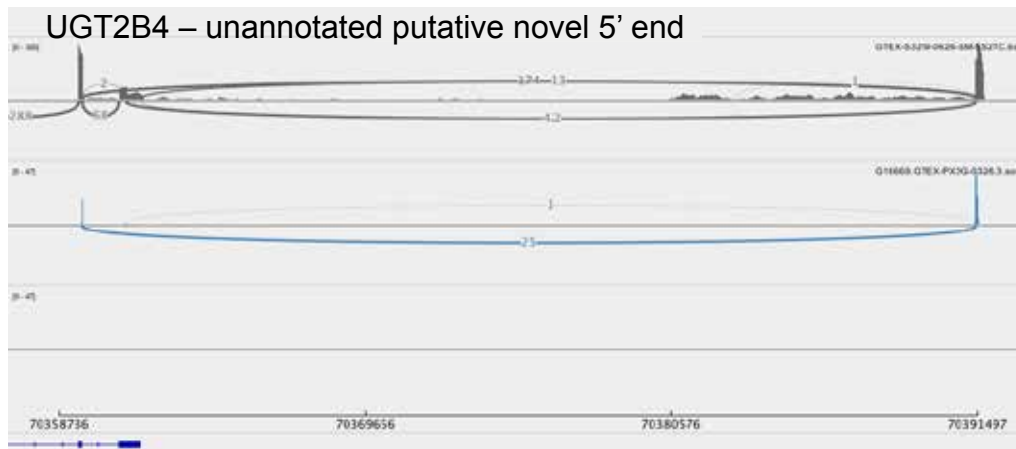

# KIF25

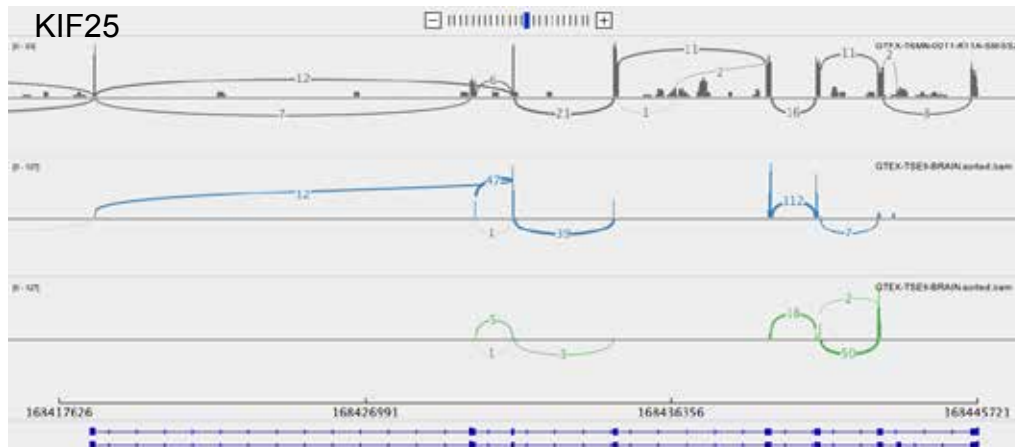

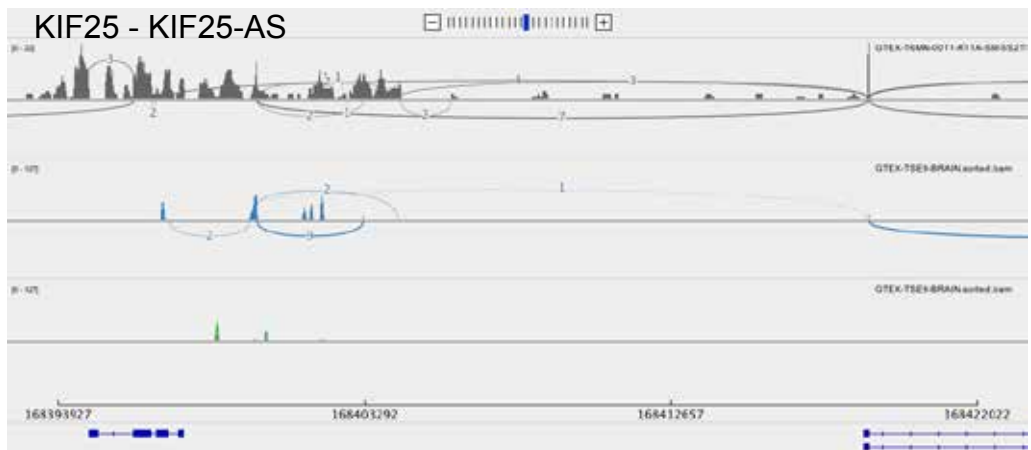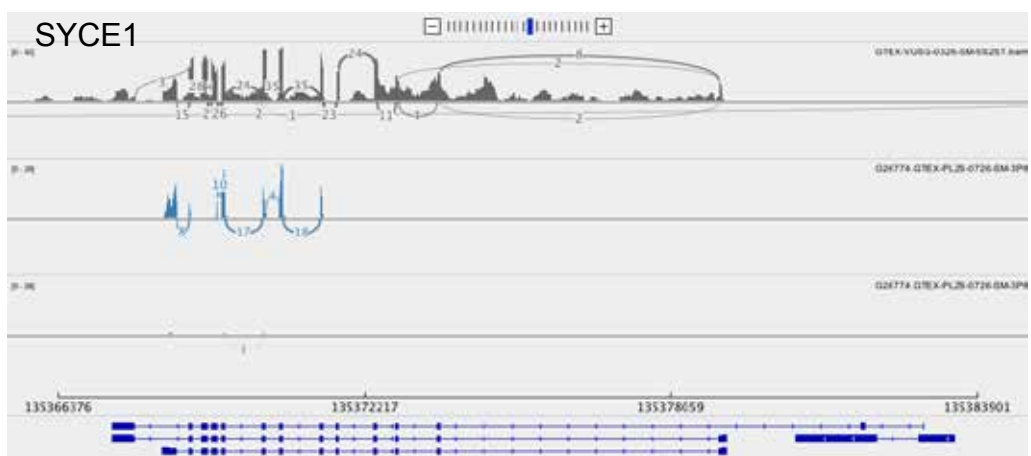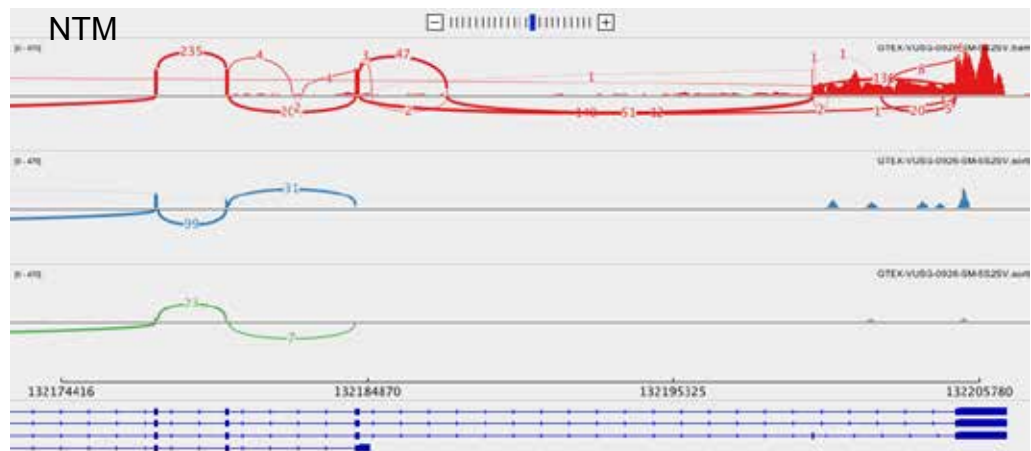

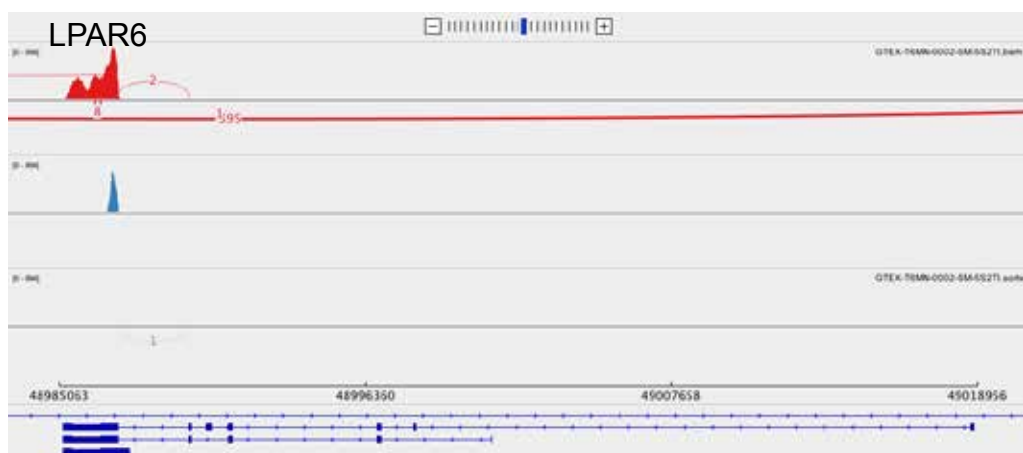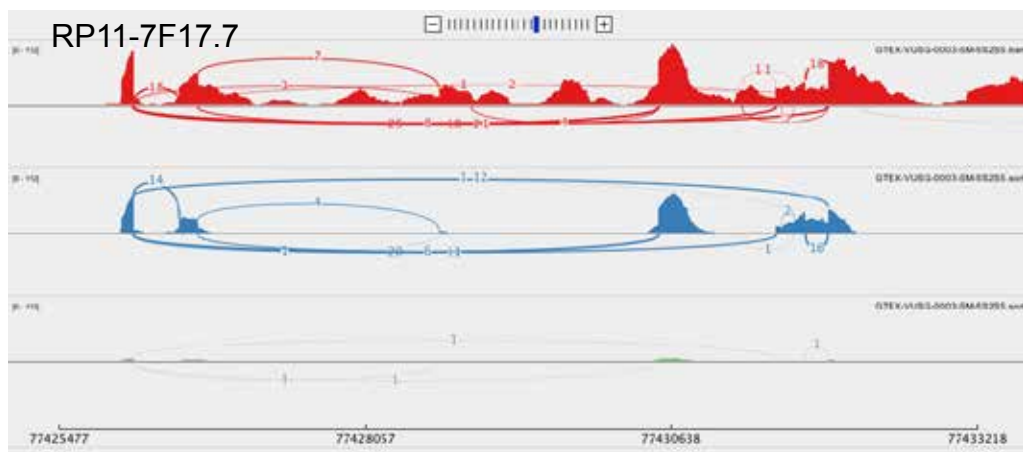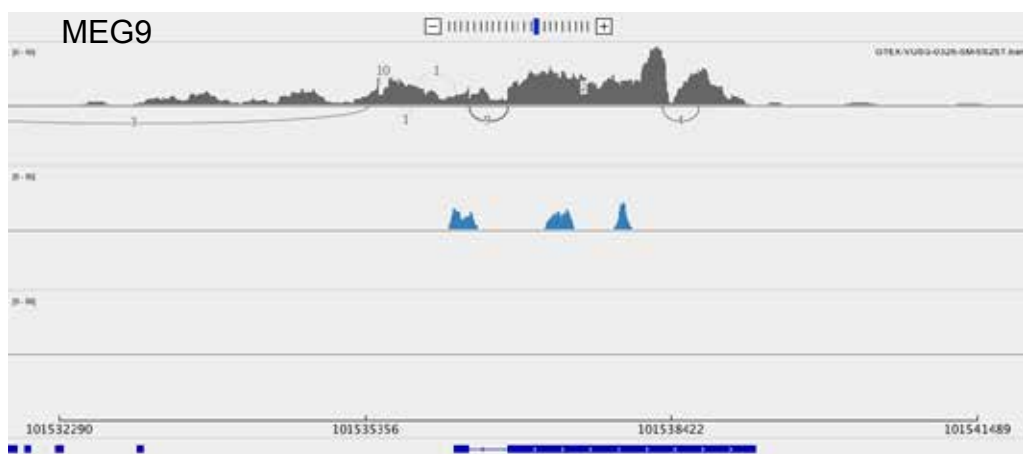

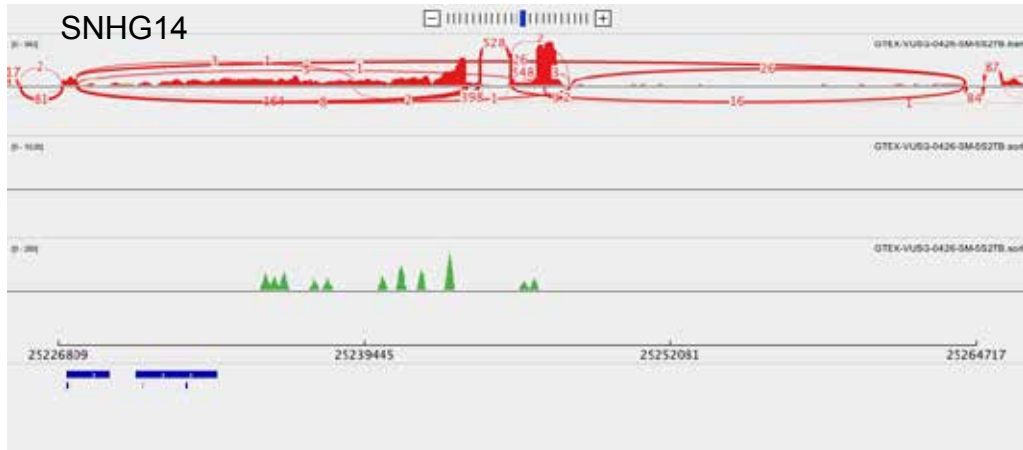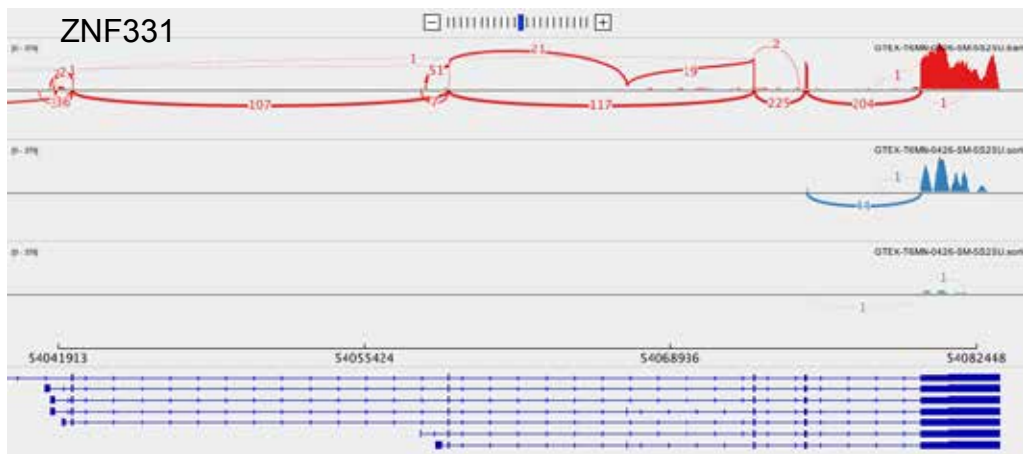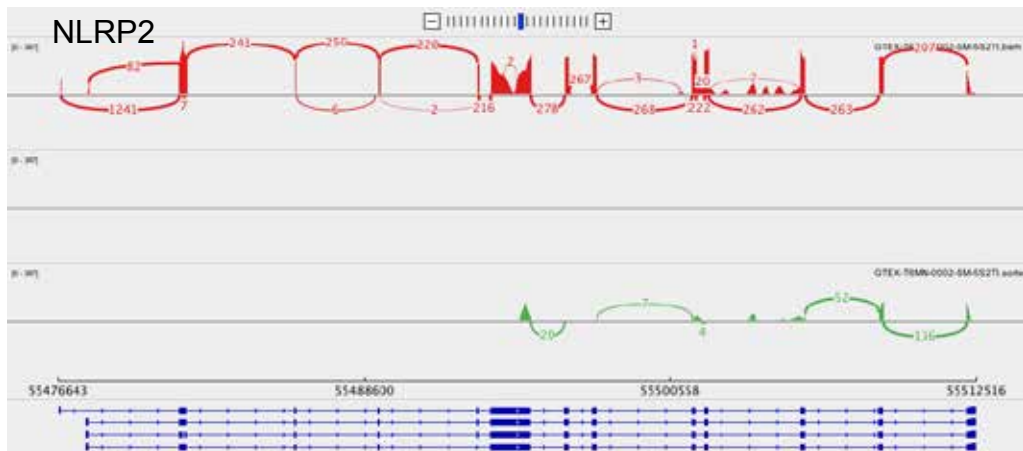

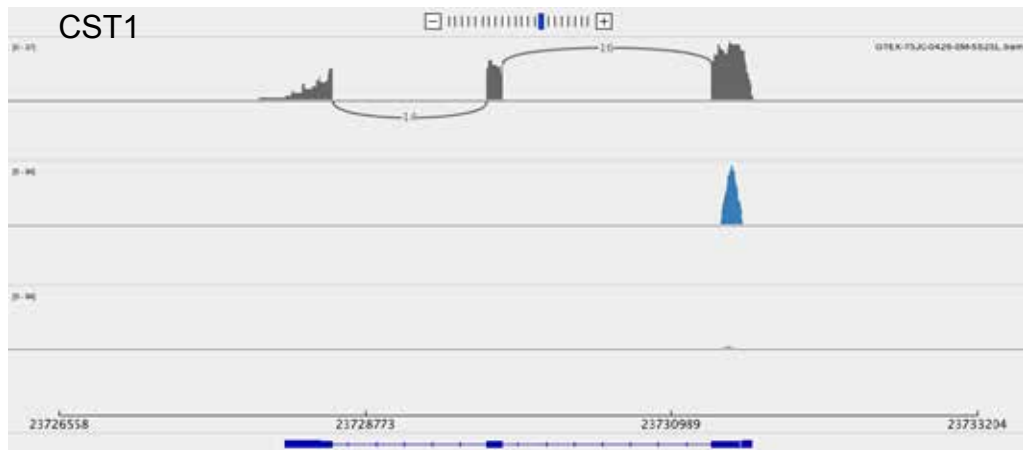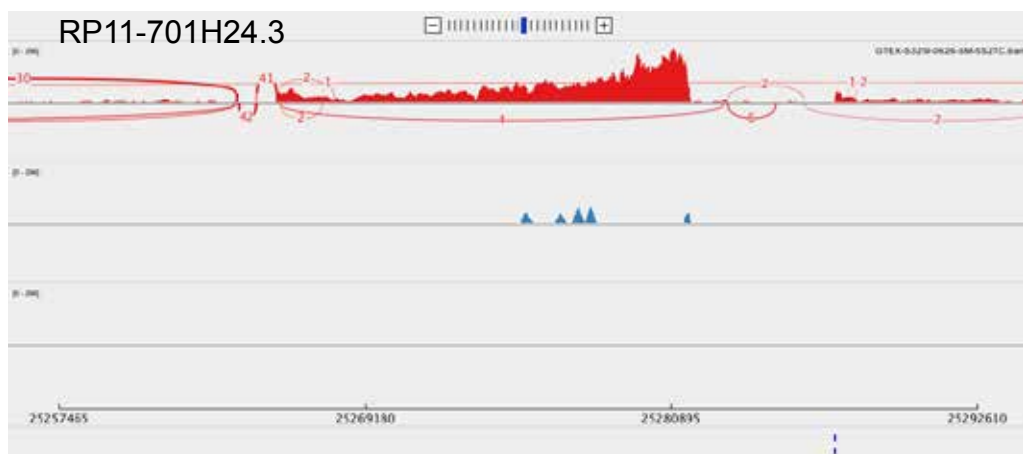

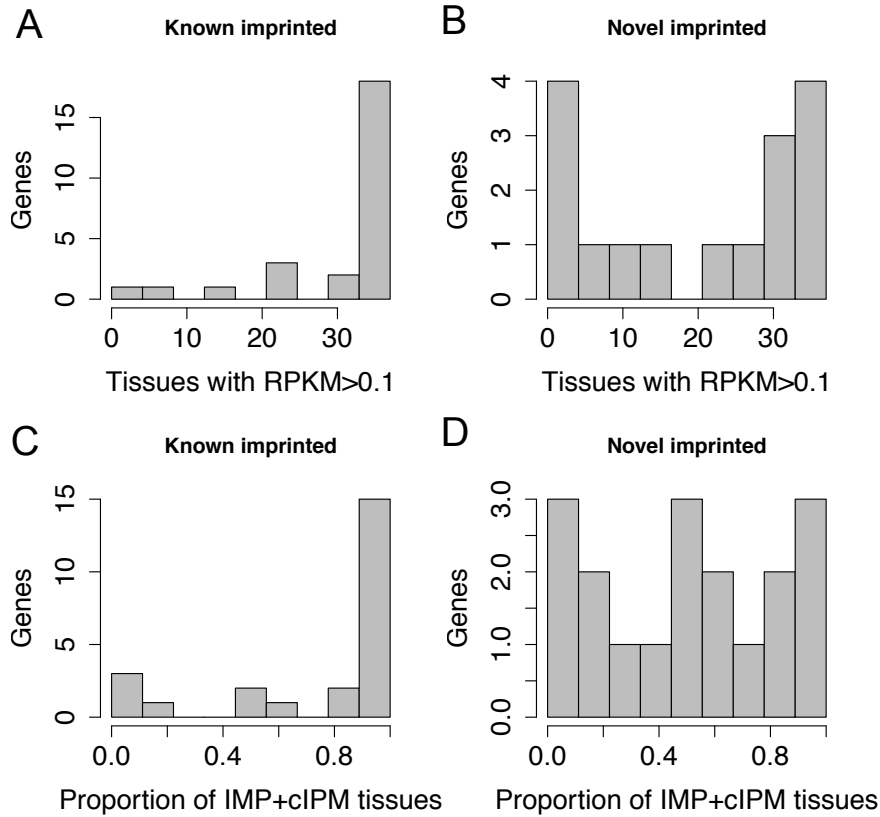

**Fig. S8.**

Known versus novel imprinted genes. Of the 42 imprinted genes identified in this study, 28 were included in previous catalogs (“known”) and 12 were novel. A) and (b) show the number of tissues where the genes are expressed at >0.1 RPKM for known and novel genes, respectively. C) and (d) show the proportion of tissues where the genes are imprinted ( $(IMP + cIMP) / (IMP + cIMP + BI + cBI)$ ) for known and novel genes, respectively.

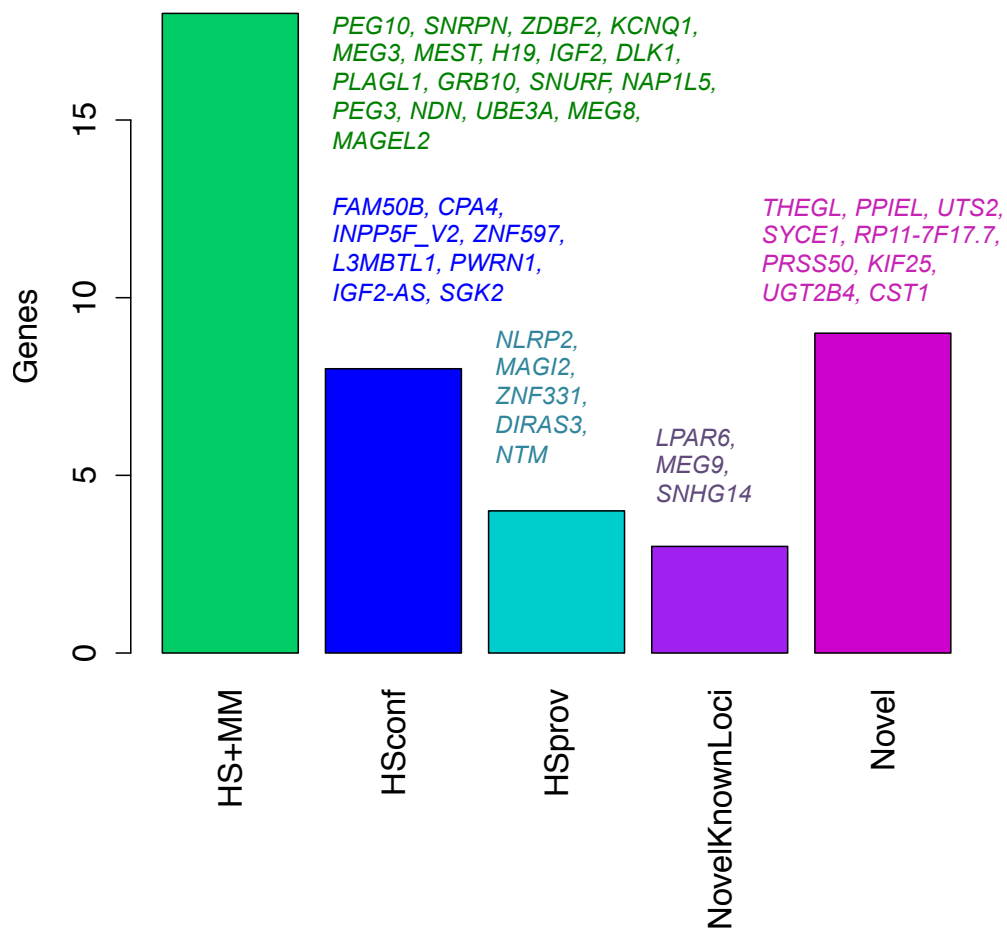

**Fig. S9.**

Detected imprinted genes classified by previously known imprinting in both humans and the mouse (green), only in humans (blue for confidently identified, cyan for provisional), novel genes that are inside known imprinted loci (red) and fully novel genes (green).

Levels of imprinting ( $\tau$ ) detected in all previously characterized human imprinted genes where we had data, excluding those found imprinted and shown in Fig. 2.



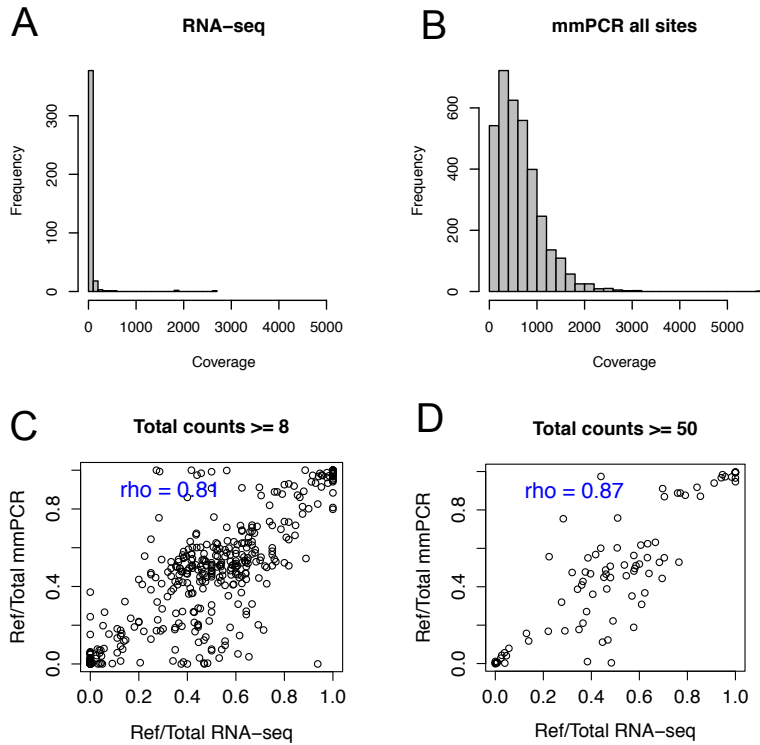

**Fig. S11.**

Validation of allelic ratios by mmPCR. Coverage per validated site in the original GTEx RNA-seq data (A) and in mmPCR data (B) shows a dramatically higher coverage in mmPCR data. The correlation of allelic ratios in the two data sets is high, as shown by (C) for sites with  $\geq 8$  reads (the minimum in our analysis) and in (D) for sites with  $\geq 50$  reads. Importantly, while the correlation is not perfect, the patterns do not suggest any systematic bias affecting allelic ratios in RNA-seq.



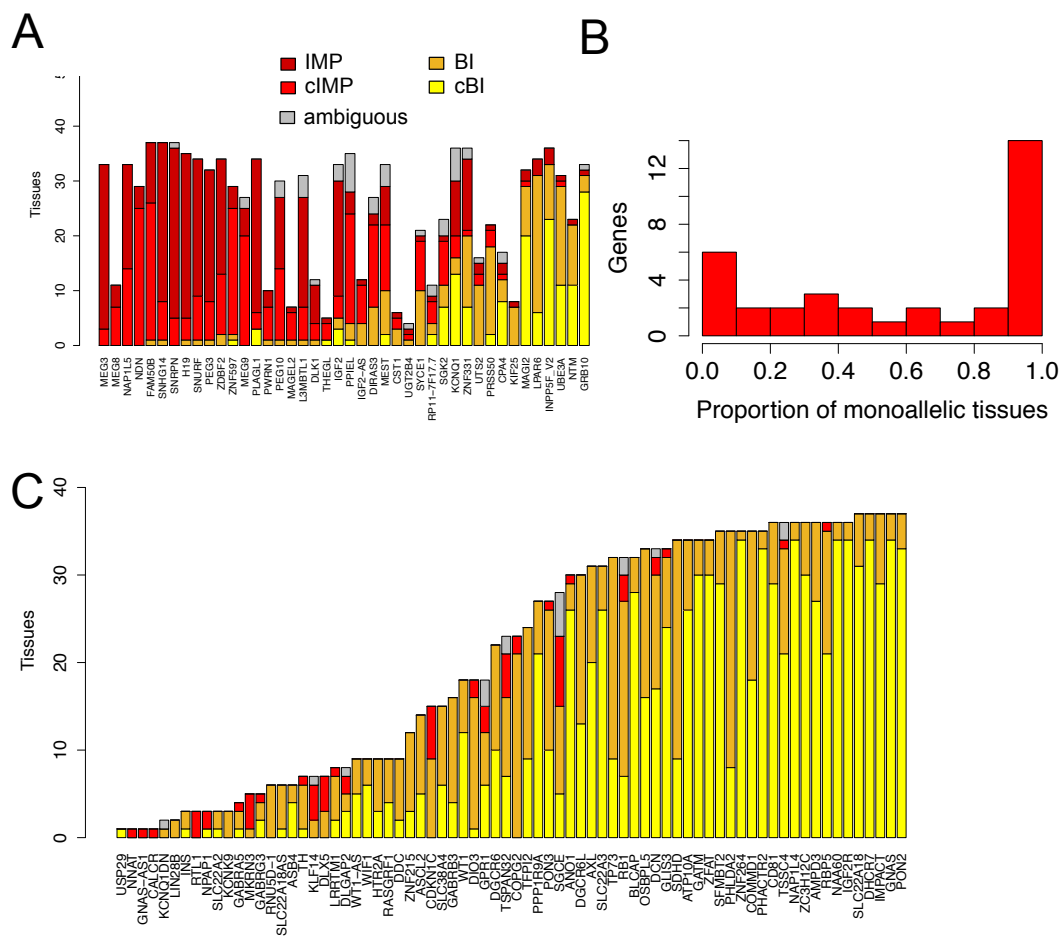

**Fig. S13.**

Imprinting status across tissues of each of the genes classified as imprinted in this study (A), and previously known genes that were not classified as imprinted and included in (a) (C). B) summarizes the data in (A) by showing the distribution of (cIMP+IMP)/(cIMP+IMP+cBI+BI) tissues for each gene.

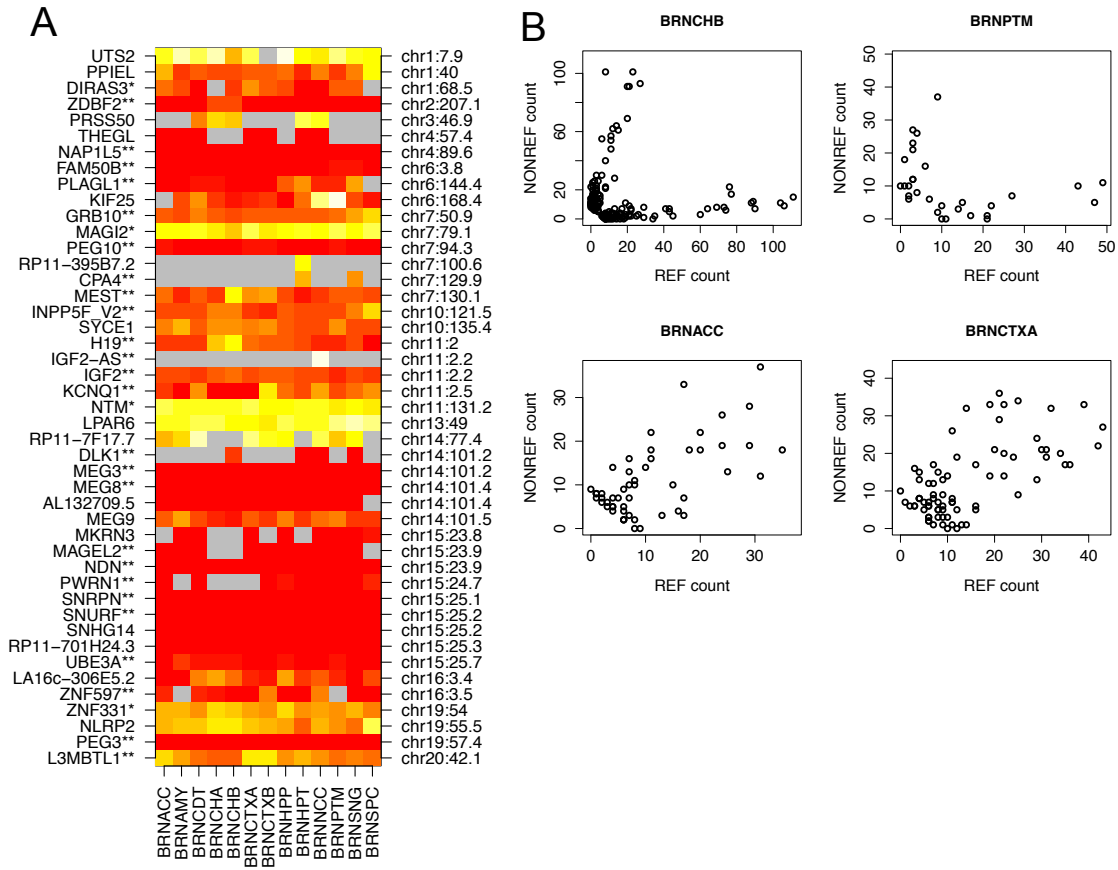

**Fig. S14.**

Imprinting across 13 sub-regions of the brain. A) shows a heatmap of  $\tau$  (analogously to Fig. 2) for the brain sub-regions, demonstrating a generally consistent pattern across the different regions. Closer inspection revealed solid signs of tissue heterogeneity only in L3MBTL1, with four example sub-tissues shows in (B) – the top row tissues appear to have imprinted genes, whereas the bottom contains biallelic genes.

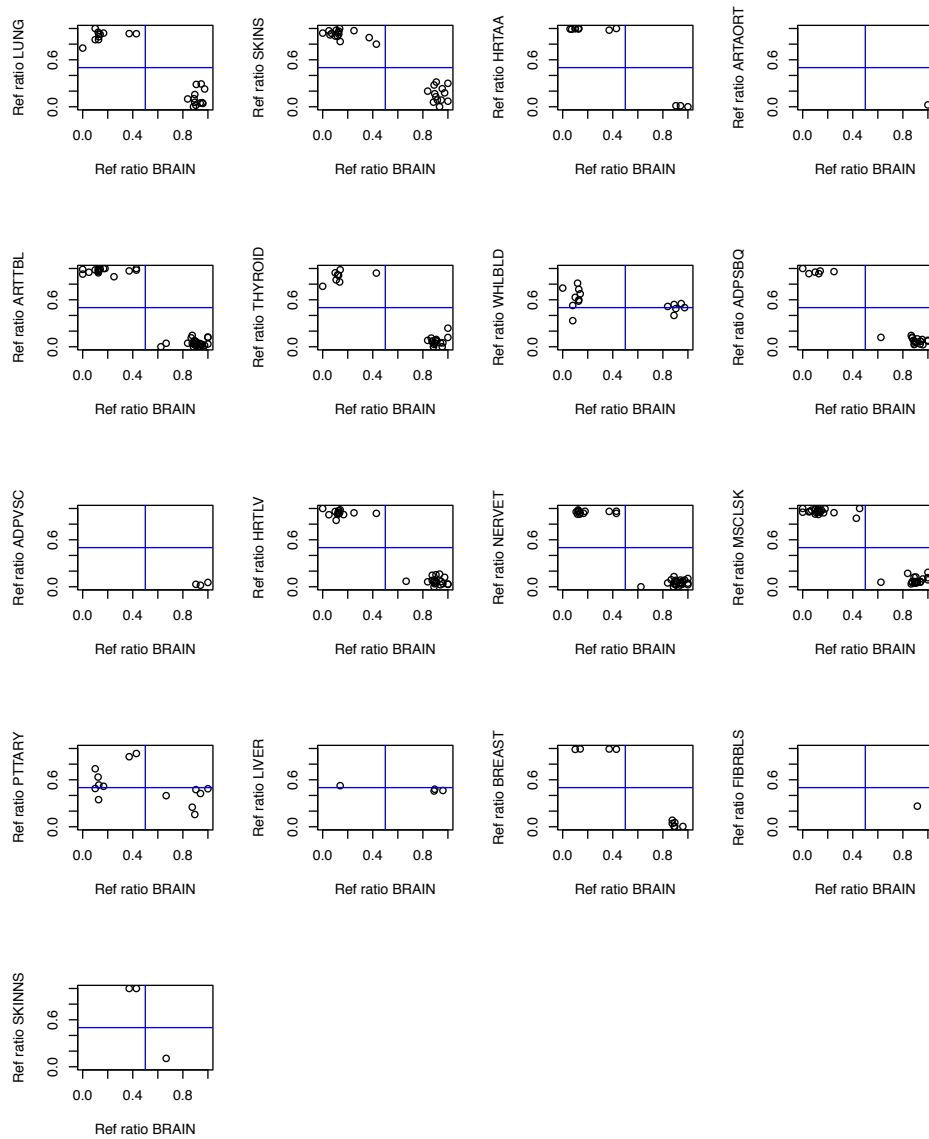

**Fig. S15.**

Allelic ratio of IGF2 of each of the tissues compared to allelic ratio in the brain. Each dot represent a SNP in one individual. Most tissues show a clear reversal of the direction of imprinting compared to the brain. See also section 9.

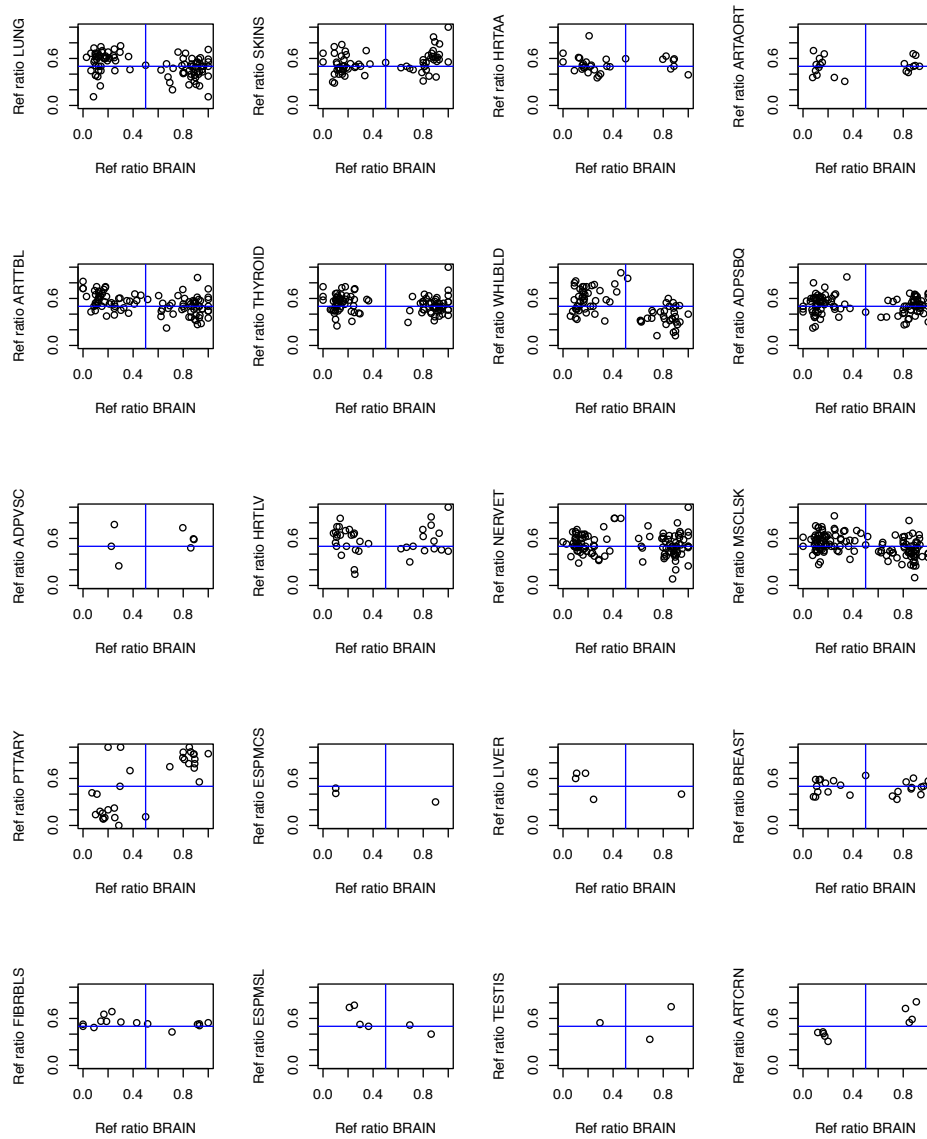

**Fig. S16.**

Allelic ratio of GRB10 of each of the tissues compared to allelic ratio in the brain. Each dot represent a SNP in one individual. Most tissues do not show strong imprinting, but for example blood shows an allelic bias to the opposite direction to that in the brain, and pituitary gland shows imprinting consistent with the brain.

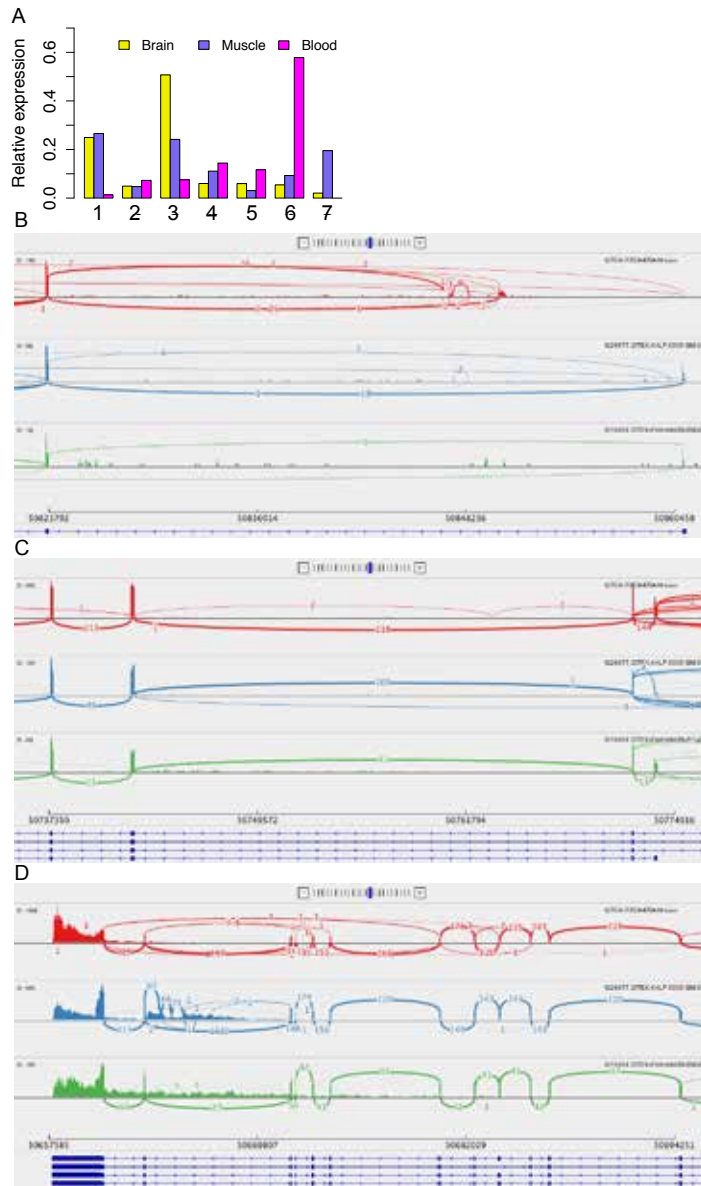

**Fig. S17.**

Transcript structure in GRB10 for brain, whole blood (WHLBLD) and muscle (MSCLSK), of which brain shows a strong signal of imprinting (Fig. S16) while blood and muscle show a biased allelic expression in the opposite direction. (A) shows relative expression levels of transcripts 1-7 corresponding to ENST00000406641, ENST0000047396, ENST00000439599, ENST00000398791, ENST00000461886, ENST00000398810, respectively. The sashimi plots in a-c show RNA-seq coverage and splicing in brain (red), blood (blue) and muscle (green) with clear differences especially in the 5' end, suggesting different promoters. However, analysis of allelic expression of the SNPs located in different parts of the transcripts yielded inconclusive results of putative transcript-specific imprinting.





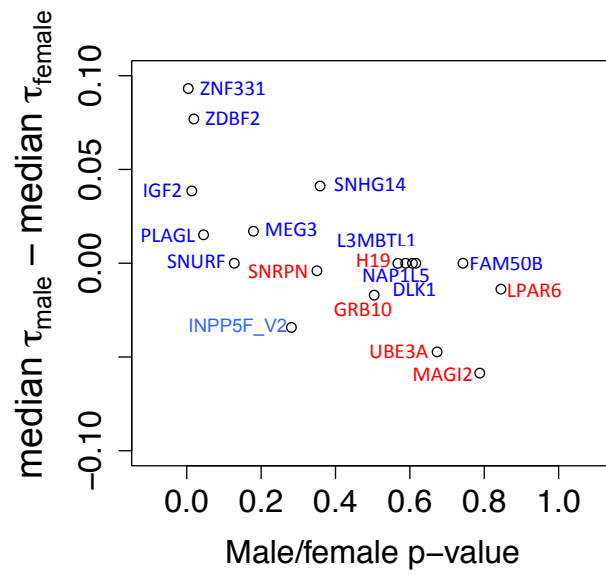

**Fig. S19.**

Gender difference in imprinting in the muscle for genes classified as imprinted in this tissue. For each gene, we compared the  $\tau$  values of males and females: the y-axis shows the median  $\tau$  per gene for males minus median  $\tau$  per gene for females, and the Mann-Whitney p-value of the the comparison is on the x-axis.

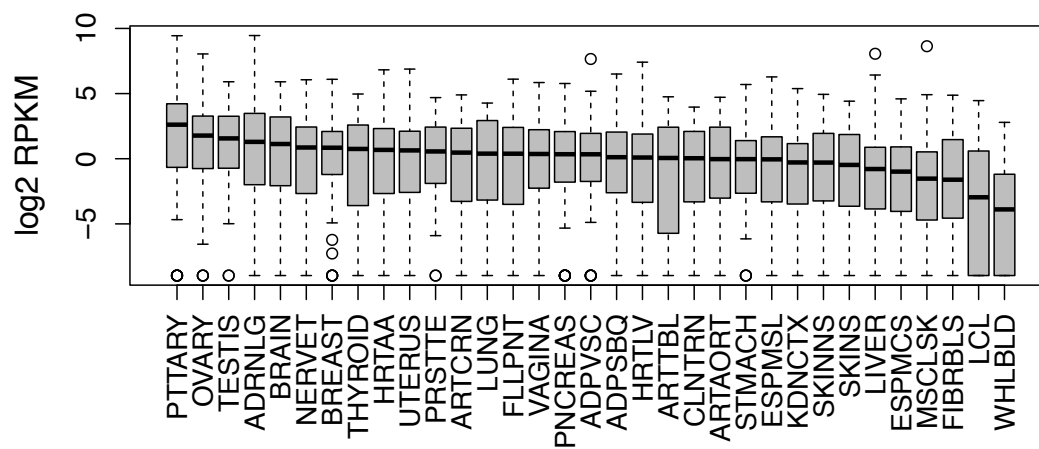

**Fig. S20.**

Distribution of expression levels per tissue of the 42 genes detected as imprinted in this study. All the 42 genes were included in each tissue, regardless of their imprinting status.



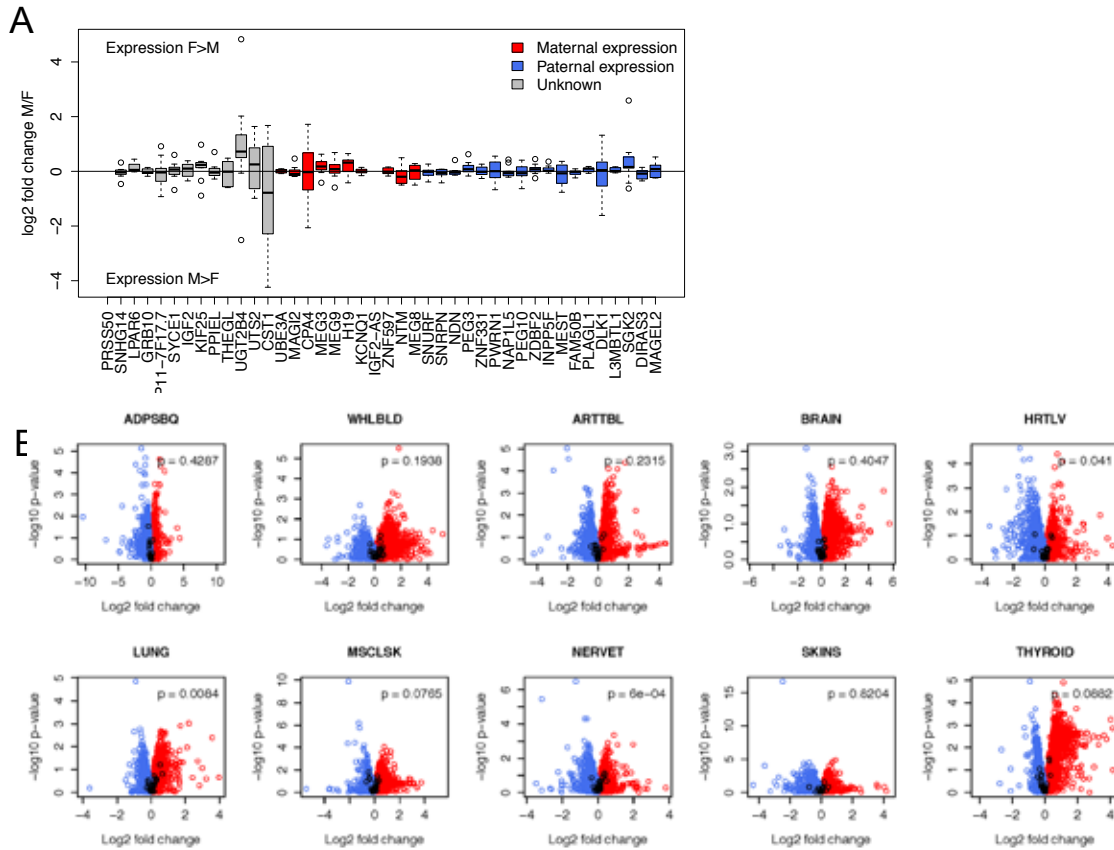

**Fig. S22.**

Gender differences in gene expression. A) shows log2 fold changes in expression levels measures as RPKM from all the tissues per gene. Values above 0 indicate higher expression in females. Maternally versus paternally expressed genes do not show significant differences in the proportion of genes with higher expression in females or males ( $p = 0.27$  based on permutation of maternal/paternal labels). We also performed this analysis separately for each tissue (B), but did not find individual genes with significant expression differences. However, in muscle and nerve, imprinted genes show more differential expression between males and females than other genes. Imprinted genes are marked in black, and the nominal p-values are from a Mann-Whitney test of comparing absolute log2 fold change distribution of imprinted genes to all other genes.

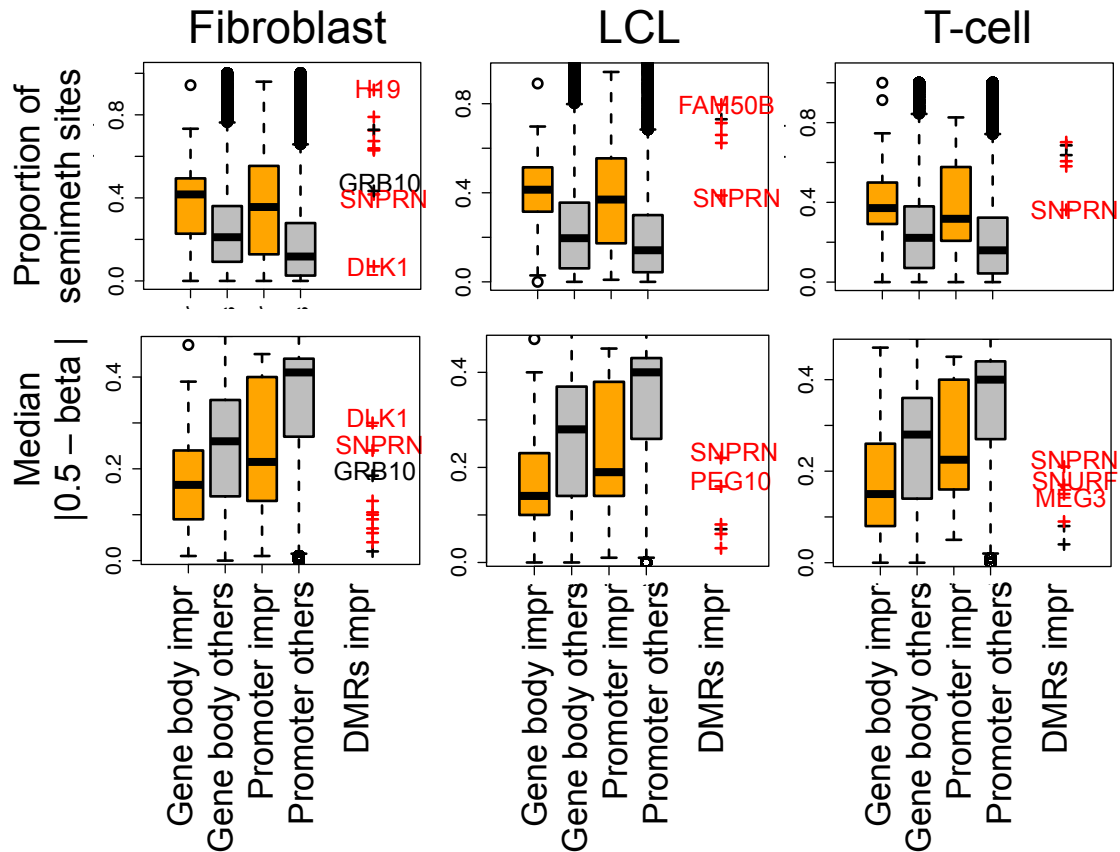

**Fig. S23.**

Methylation analysis. For each of the three cell types, we show two methylation statistics that summarize data across individuals and methylation sites – with the aim to detect methylation of only one allele as expected in imprinted loci. Other statistics showed similar trends (data not shown). The top row shows the proportion of semimethylated sites (sites with methylation beta value  $x-y$ ) over the total, pooling all sites and individuals. The bottom row shows the median deviation from semimethylation (0.5) over all sites and individuals. These statistics are compared between imprinted genes in each of the three cell types and all other genes, both for gene body and promoters (boxplots). The gene names show the same statistics calculated from differentially methylated regions (DMRs; (Court et al. 2014)) for genes with a known DMR, with the gene names in red indicating an imprinted status in this study for the corresponding cell type. The DMRs are for SNRPN, MEG3, ZNF331, KCNQ1, SNURF, FAM50B, PPIEL, DLK1, PEG10, IGF2, DIRAS3, PLAGL1, MEST, H19, and GRB10.

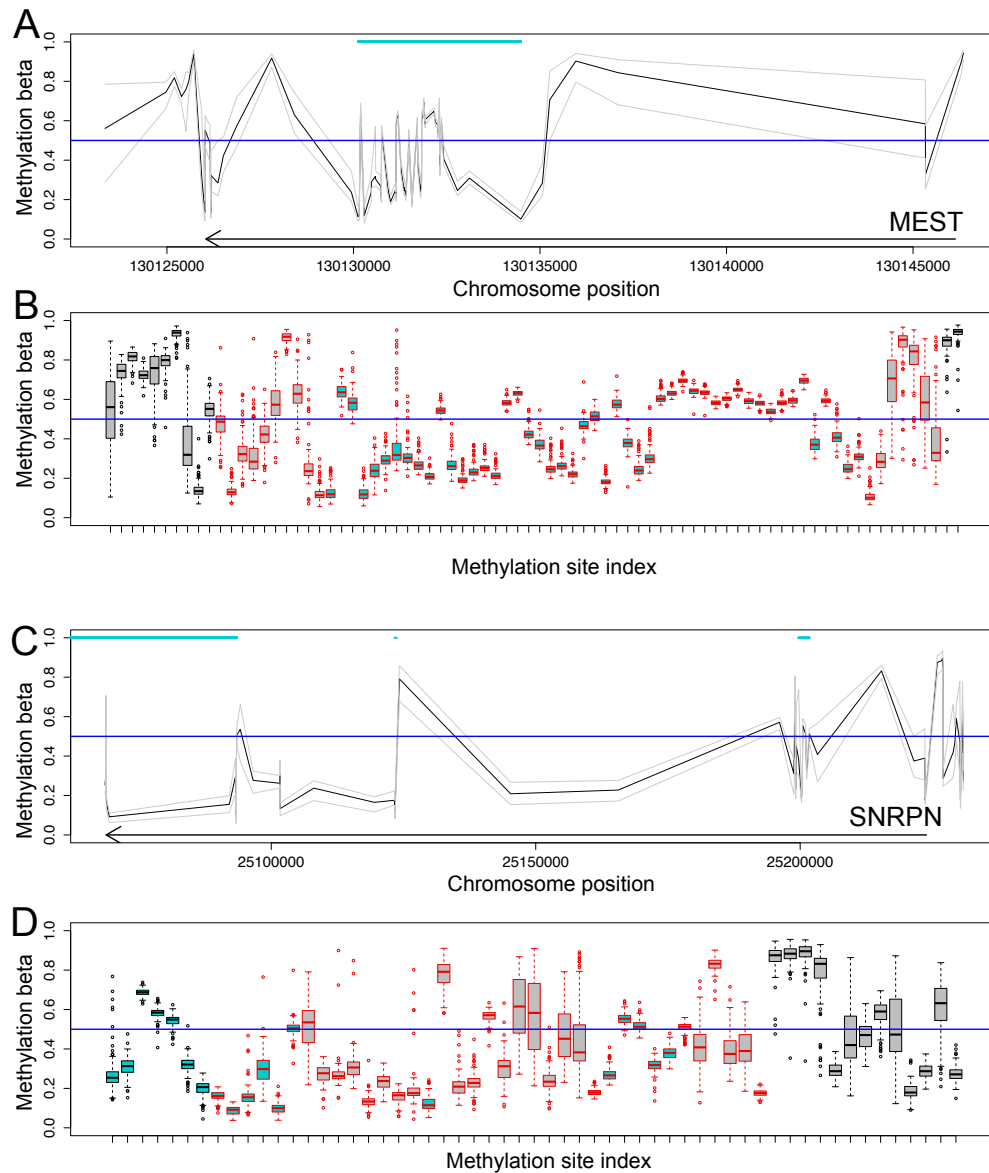

**Fig. S24.**

Examples of methylation landscapes in imprinted loci in *MEST* (a,b) and *SNRPN* (c,d) in Gencord fibroblast data. The lineplots in (a,c) show the methylation level (beta) as a median across individuals (black line) and the grey lines denote 10<sup>th</sup> and 90<sup>th</sup> quantiles. The arrow shows the gene region, and the cyan bars denotes differentially methylated regions. The boxplots in (b,d) are the same data, showing the full population distribution of each site and without scaling of the x-axis according to chromosomal position. The red boxes are for the gene region, and cyan color denotes differentially methylated regions.

**Table S1.**

Samples of the primary data sets of this study. The clonality proportion is estimated from monoallelic expression in the X chromosome in female samples; see Fig. S5. The validation data and samples are described in the text and the Supplementary Text.

**Table S2.**

Sources and characteristic of monoallelic expression

**Table S3.**

Summary statistics of the 42 identified as imprinted. Definitions of the column names are in Supplementary Text section 7.

**Table S4.**

Summary statistics of putatively imprinted genes. Definitions of the column names are in Supplementary Text section 7.

**Table S5.**

Summary statistics of all analyzed genes. Definitions of the column names are in Supplementary Text section 7.

**Table S6.**

List of known and putatively imprinted genes in human. HS and MM denote human and mouse, respectively, and the notes indicate data source or status other than the Otago database (Morison et al. 2001). The classification in our data is summarized across tissues with a hierarchy of (consistent with biallelic) < biallelic < (consistent with imprinting) < imprinted.

**Table S7.**

Results of the analysis of family validation data.

**Data S1.**

Scatterplots of read counts for the imprinted genes for each tissue, with each dot representing read counts per SNP per individual.

**Data S2.**

Scatterplots of read counts for the imprinted genes for each tissue, with each dot representing read counts per haplotype per individual, thus combining data from multiple SNPs (including imputed variants) when an individual has several heterozygous sites per gene.

**Data S3.**

Scatterplots of read counts for the known imprinted genes (as defined in 8) for each tissue, with each dot representing read counts per SNP per individual.

**Data S4.**

Scatterplots of read counts for the known imprinted genes (as defined in 8) for each tissue, with each dot representing read counts per haplotype per individual, thus combining data from multiple SNPs (including imputed variants) when an individual has several heterozygous sites per gene.

**Data S5.**

The software implementing all methods described in this paper.

**References**

- Andres AM, Dennis MY, Kretzschmar WW, Cannons JL, Lee-Lin SQ, Hurle B, Program NCS, Schwartzberg PL, Williamson SH, Bustamante CD et al. 2010. Balancing selection maintains a form of ERAP2 that undergoes nonsense-mediated decay and affects antigen presentation. *PLoS Genet* **6**(10): e1001157.
- Borrell LN, Nguyen EA, Roth LA, Oh SS, Tcheurekdjian H, Sen S, Davis A, Farber HJ, Avila PC, Brigino-Buenaventura E et al. 2013. Childhood obesity and asthma control in the GALA II and SAGE II studies. *American journal of respiratory and critical care medicine* **187**(7): 697-702.
- Celeux G, Diebolt J. 1985. The SEM algorithm: a probabilistic teacher algorithm derived from the EM algorithm for the mixture problem. *Computational statistics quarterly* **2**(1): 73-82.
- Cho H, Davis J, Li X, Smith KS, Battle A, Montgomery SB. 2014. High-resolution transcriptome analysis with long-read RNA sequencing. *PLoS One* **9**(9): e108095.
- Court F, Tayama C, Romanelli V, Martin-Trujillo A, Iglesias-Platas I, Okamura K, Sugahara N, Simon C, Moore H, Harness JV et al. 2014. Genome-wide parent-of-origin DNA methylation analysis reveals the intricacies of human imprinting and suggests a germline methylation-independent mechanism of establishment. *Genome Res* **24**(4): 554-569.
- Dobin A, Davis CA, Schlesinger F, Drenkow J, Zaleski C, Jha S, Batut P, Chaisson M, Gingeras TR. 2013. STAR: ultrafast universal RNA-seq aligner. *Bioinformatics* **29**(1): 15-21.
- Gimelbrant A, Hutchinson JN, Thompson BR, Chess A. 2007. Widespread monoallelic expression on human autosomes. *Science* **318**(5853): 1136-1140.
- Jeon Y, Sarma K, Lee JT. 2012. New and Xisting regulatory mechanisms of X chromosome inactivation. *Current opinion in genetics & development* **22**(2): 62-71.



- Kuleshov V, Xie D, Chen R, Pushkarev D, Ma Z, Blauwkamp T, Kertesz M, Snyder M. 2014. Whole-genome haplotyping using long reads and statistical methods. *Nat Biotechnol* **32**(3): 261-266.
- Kumar R, Nguyen EA, Roth LA, Oh SS, Gignoux CR, Huntsman S, Eng C, Moreno-Estrada A, Sandoval K, Penaloza-Espinosa RI et al. 2013. Factors associated with degree of atopy in Latino children in a nationwide pediatric sample: the Genes-environments and Admixture in Latino Asthmatics (GALA II) study. *The Journal of allergy and clinical immunology* **132**(4): 896-905 e891.
- Li S, Tighe SW, Nicolet CM, Grove D, Levy S, Farmerie W, Viale A, Wright C, Schweitzer PA, Gao Y et al. 2014. Multi-platform assessment of transcriptome profiling using RNA-seq in the ABRF next-generation sequencing study. *Nat Biotechnol* **32**(9): 915-925.
- Monk D, Arnaud P, Frost JM, Wood AJ, Cowley M, Martin-Trujillo A, Guillaumet-Adkins A, Iglesias Platas I, Camprubi C, Bourc'his D et al. 2011. Human imprinted retrogenes exhibit non-canonical imprint chromatin signatures and reside in non-imprinted host genes. *Nucleic Acids Res* **39**(11): 4577-4586.
- Morison IM, Paton CJ, Cleverley SD. 2001. The imprinted gene and parent-of-origin effect database. *Nucleic Acids Res* **29**(1): 275-276.
- Nishimura KK, Galanter JM, Roth LA, Oh SS, Thakur N, Nguyen EA, Thyne S, Farber HJ, Serebrisky D, Kumar R et al. 2013. Early-life air pollution and asthma risk in minority children. The GALA II and SAGE II studies. *American journal of respiratory and critical care medicine* **188**(3): 309-318.
- Poole A, Urbanek C, Eng C, Schageman J, Jacobson S, O'Connor BP, Galanter JM, Gignoux CR, Roth LA, Kumar R et al. 2014. Dissecting childhood asthma with nasal transcriptomics distinguishes subphenotypes of disease. *The Journal of allergy and clinical immunology* **133**(3): 670-678 e612.
- Rivas MA, Pirinen M, Conrad DF, Lek M, Tsang EK, Karczewski KJ, Maller JB, Kukurba KR, DeLuca D, Fromer M et al. 2015. Impact of predicted protein-truncating genetic variants on the human transcriptome. *Submitted*.
- Torgerson DG, Ampleford EJ, Chiu GY, Gauderman WJ, Gignoux CR, Graves PE, Himes BE, Levin AM, Mathias RA, Hancock DB et al. 2011. Meta-analysis of genome-wide association studies of asthma in ethnically diverse North American populations. *Nat Genet* **43**(9): 887-892.
- Zhang R, Li X, Ramaswami G, Smith KS, Turecki G, Montgomery SB, Li JB. 2014. Quantifying RNA allelic ratios by microfluidic multiplex PCR and sequencing. *Nat Methods* **11**(1): 51-54.
